# Supplementary material for: A tailored strategy for designing the Walk-Copenhagen (WALK-Cph) intervention to increase mobility in hospitalised older medical patients: a protocol for the qualitative part of the WALK-Cph project
Source: PubMed Central journal article supplement — BMJ Open. 2018 Mar 8;8(3):e020272. doi: 10.1136/bmjopen-2017-020272 (PMC5855176; doi:10.1136/bmjopen-2017-020272), 2018-03-08
Supplement: bmjopen-2017-020272.draft_revisions.pdf [file bmjopen-2017-020272.draft_revisions.pdf]

# BMJ Open

BMJ Open is committed to open peer review. As part of this commitment we make the peer review history of every article we publish publicly available.

When an article is published we post the peer reviewers' comments and the authors' responses online. We also post the versions of the paper that were used during peer review. These are the versions that the peer review comments apply to.

The versions of the paper that follow are the versions that were submitted during the peer review process. They are not the versions of record or the final published versions. They should not be cited or distributed as the published version of this manuscript.

BMJ Open is an open access journal and the full, final, typeset and author-corrected version of record of the manuscript is available on our site with no access controls, subscription charges or pay-per-view fees (<http://bmjopen.bmj.com>).

If you have any questions on BMJ Open's open peer review process please email [info.bmjopen@bmj.com](mailto:info.bmjopen@bmj.com)

# BMJ Open

## A tailored strategy for designing the WALK-Copenhagen intervention to increase mobility in hospitalized elderly medical patients: a protocol for the qualitative part of the WALK-Copenhagen project

|                               |                                                                                                                                                                                                                                                                                                                                                                                                                                                                                                                                                                                                                                                                                                                                                                                                                                                                                                                                                                                                                                                                                                                                                                                                                                                                                                                                                                                                                                                                                                                                                                                                                                                                      |
|-------------------------------|----------------------------------------------------------------------------------------------------------------------------------------------------------------------------------------------------------------------------------------------------------------------------------------------------------------------------------------------------------------------------------------------------------------------------------------------------------------------------------------------------------------------------------------------------------------------------------------------------------------------------------------------------------------------------------------------------------------------------------------------------------------------------------------------------------------------------------------------------------------------------------------------------------------------------------------------------------------------------------------------------------------------------------------------------------------------------------------------------------------------------------------------------------------------------------------------------------------------------------------------------------------------------------------------------------------------------------------------------------------------------------------------------------------------------------------------------------------------------------------------------------------------------------------------------------------------------------------------------------------------------------------------------------------------|
| Journal:                      | <i>BMJ Open</i>                                                                                                                                                                                                                                                                                                                                                                                                                                                                                                                                                                                                                                                                                                                                                                                                                                                                                                                                                                                                                                                                                                                                                                                                                                                                                                                                                                                                                                                                                                                                                                                                                                                      |
| Manuscript ID                 | bmjopen-2017-020272                                                                                                                                                                                                                                                                                                                                                                                                                                                                                                                                                                                                                                                                                                                                                                                                                                                                                                                                                                                                                                                                                                                                                                                                                                                                                                                                                                                                                                                                                                                                                                                                                                                  |
| Article Type:                 | Protocol                                                                                                                                                                                                                                                                                                                                                                                                                                                                                                                                                                                                                                                                                                                                                                                                                                                                                                                                                                                                                                                                                                                                                                                                                                                                                                                                                                                                                                                                                                                                                                                                                                                             |
| Date Submitted by the Author: | 24-Oct-2017                                                                                                                                                                                                                                                                                                                                                                                                                                                                                                                                                                                                                                                                                                                                                                                                                                                                                                                                                                                                                                                                                                                                                                                                                                                                                                                                                                                                                                                                                                                                                                                                                                                          |
| Complete List of Authors:     | <p>Kirk, Jeanette; Copenhagen University Hospital Hvidovre, Hvidovre, Denmark , Clinical Research Centre</p> <p>Bodilsen, Ann Christine ; Copenhagen University Hospital Hvidovre, Hvidovre, Denmark , Clinical Research Centre; Exercise and Health, Roskilde Municipality, Roskilde, Denmark</p> <p>Tjørnhøj-Thomsen, Tine ; National Institute of Public Health, University of Southern Denmark</p> <p>Pedersen, Mette Merete; Copenhagen University Hospital Hvidovre, Hvidovre, Denmark , Clinical Research Centre; Physical Medicine &amp; Rehabilitation Research-Copenhagen, Copenhagen University Hospital Hvidovre,</p> <p>Bandholm, Thomas; Copenhagen University Hospital Hvidovre, Hvidovre, Denmark , Clinical Research Centre; Physical Medicine &amp; Rehabilitation Research-Copenhagen, Copenhagen University Hospital Hvidovre, Hvidovre, Denmark</p> <p>Husted, Rasmus; Copenhagen University Hospital Hvidovre, Hvidovre, Denmark , Clinical Research Centre; Physical Medicine &amp; Rehabilitation Research-Copenhagen, Copenhagen University Hospital Hvidovre</p> <p>Poulsen, Lise; Copenhagen University Hospital Hvidovre, Hvidovre, Denmark , Clinical Research Centre</p> <p>Petersen, Janne; Copenhagen University Hospital Hvidovre, Hvidovre, Denmark , Clinical Research Centre; Section of Biostatistics, Department of Public Health, University of Copenhagen, Copenhagen, Denmark</p> <p>Andersen, Ove; Copenhagen University Hospital, Hvidovre, Denmark, Clinical Research Centre</p> <p>Nilsen, Per ; Division of Community Medicine, Department of Medical and Health Sciences, Linköping University, Linköping, Sweden</p> |
| Keywords:                     | Elderly medical patients, critical realism, implementation, study protocol                                                                                                                                                                                                                                                                                                                                                                                                                                                                                                                                                                                                                                                                                                                                                                                                                                                                                                                                                                                                                                                                                                                                                                                                                                                                                                                                                                                                                                                                                                                                                                                           |
|                               |                                                                                                                                                                                                                                                                                                                                                                                                                                                                                                                                                                                                                                                                                                                                                                                                                                                                                                                                                                                                                                                                                                                                                                                                                                                                                                                                                                                                                                                                                                                                                                                                                                                                      |

SCHOLARONE™  
Manuscripts

1 A tailored strategy for designing the WALK-Copenhagen  
2 intervention to increase mobility in hospitalized elderly medical  
3 patients: a protocol for the qualitative part of the WALK-  
4 Copenhagen project

5 Jeanette Wassar Kirk,<sup>1</sup> Ann Christine Bodilsen,<sup>1,2</sup> Tine Tjørnhøj-Thomsen,<sup>3</sup> Mette  
6 Merete Pedersen,<sup>1,4,5</sup> Thomas Bandholm,<sup>1,4,5,6</sup> Rasmus Skov Husted,<sup>1,4,5</sup> Lise  
7 Kronborg,<sup>1</sup> Janne Petersen,<sup>1,7</sup> Ove Andersen,<sup>1</sup> Per Nilsen<sup>8</sup>

8 <sup>1</sup>Optimed, Clinical Research Centre, Copenhagen University Hospital Hvidovre, Hvidovre,  
9 Denmark

10 <sup>2</sup>Exercise and Health, Roskilde Municipality, Roskilde, Denmark

11 <sup>3</sup>National Institute of Public Health, University of Southern Denmark, Copenhagen, Denmark

12 <sup>4</sup>Physical Medicine & Rehabilitation Research-Copenhagen, Copenhagen University Hospital  
13 Hvidovre, Hvidovre, Denmark

14 <sup>5</sup>Department of Physical and Occupational Therapy, Copenhagen University Hospital Hvidovre,  
15 Hvidovre, Denmark

16 <sup>6</sup>Department of Orthopedic Surgery, Copenhagen University Hospital Hvidovre, Hvidovre,  
17 Denmark

18 <sup>7</sup>Section of Biostatistics, Department of Public Health, University of Copenhagen, Copenhagen,  
19 Denmark

1  
2  
3  
4 20 <sup>8</sup>Division of Community Medicine, Department of Medical and Health Sciences, Linköping  
5  
6 21 University, Linköping, Sweden  
7

8  
9 22 Correspondence to: Jeanette Wassar Kirk, PhD, Optimed, Clinical Research Centre, Copenhagen  
10  
11 23 University Hospital Hvidovre, Kettegaard Allé 30, 2650 Hvidovre, Denmark. . Tel: +45 38626195.  
12  
13 24 E-mail: [jeanette.wassar.kirk@regionh.dk](mailto:jeanette.wassar.kirk@regionh.dk)  
14

15 25 **Keywords:** Study protocol, elderly medical patient, mobility, qualitative methods, critical  
16  
17 26 realism, implementation.  
18

19  
20 27 Word count: 4691  
21  
22

## 23 28 **ABSTRACT**

24  
25 29 **Introduction** Elderly medical patients (>65 years) represent 54% of the admissions to Danish  
26  
27 30 medical and emergency departments. Acute admissions and bed rest during hospitalization are  
28  
29 31 independent risk factors for death and dependency in elderly patients. Even short hospitalizations  
30  
31 32 are associated with increased dependency in activities of daily living after discharge. Interventions  
32  
33 33 that reduce low mobility during hospitalization are therefore important. The aim of this article is to  
34  
35 34 describe the design of the intervention in the WALK-Copenhagen project, which aims to increase  
36  
37 35 the 24-hour mobility in older medical patients during acute hospitalizations and after discharge.  
38  
39

40  
41 36 **Methods and analysis** This study is based on ethnographic fieldwork and interviews. Workshops  
42  
43 37 will be used to develop and co-design the intervention in collaboration with key stakeholders  
44  
45 38 (patients, relatives, health professionals and researchers). Cultural learning processes, the theory of  
46  
47 39 common knowledge and cultural historical activity theory will be used to help us understand the  
48  
49 40 collaboration between health professionals, structures and artefacts, in relation to mobility in the  
50  
51 41 medical departments.  
52  
53  
54  
55  
56  
57  
58  
59  
60

1  
2  
3  
42 **Ethics and dissemination** The project adheres to the directives of the Helsinki Declaration. Ethical  
5  
6 43 approval was not required for the study because formal ethical approval is not mandatory for studies  
7  
8 44 that do not involve biomedical issues according to Danish law. Informed consent was obtained from  
9  
10 45 all participants. The results will be disseminated to health professionals, managers, patients and  
11  
12 46 relatives, who will be invited to afternoon meetings where the project will be discussed. The results  
13  
14 47 will be published in peer-reviewed scientific journals and presented at scientific conferences.  
15  
16

## 17 **Strengths and limitations of this study**

- 18  
19  
20 49 • Research shows that it is challenging to achieve increased mobility during hospitalization in  
21  
22 50 elderly patients and many barriers to achieving increased mobility behaviour have been  
23  
24 51 identified.
- 25  
26  
27 52 • Interventions that increase mobility during hospitalization are important.
- 28  
29  
30 53 • User engagement is not common when designing interventions even though research has shown  
31  
32 54 that an intervention that is developed from a user perspective and is adapted to the local context  
33  
34 55 is more likely to be successful.
- 35  
36 56 • In this study, the intervention is tailored to the local context by developing and co-designing the  
37  
38 57 intervention in collaboration with key stakeholders such as patients, relatives, health care  
39  
40 58 practitioners and researchers, according to the BMJ campaign “Partnering with patients”  
41  
42 59 ([http://www.bmj.com/company/qip\\_examples/partnering-with-patients/](http://www.bmj.com/company/qip_examples/partnering-with-patients/))
- 43  
44  
45 60 • The intervention design is based on findings from a series of qualitative studies because these  
46  
47 61 methods are well suited for providing in-depth relational knowledge for designing the most  
48  
49 62 appropriate patient intervention.  
50  
51  
52  
53  
54  
55  
56  
57  
58  
59  
60

## 63 INTRODUCTION

64 It is well recognized that complete bed rest and physical inactivity in hospitalized patients  
65 can have serious health consequences.[1] This knowledge is not new, but physical inactivity in  
66 hospital settings still remains a challenge. Older medical patients (aged 65 years or more) represent  
67 54% of the annual admissions to Danish medical and emergency departments.[2] Acute admissions  
68 and bed rest during hospitalization are independent risk factors for death and dependency in older  
69 patients,[3-5] and even short hospital stays are associated with increased dependency in activities of  
70 daily living after discharge.[5, 7] A previous Danish study showed that older medical patients who  
71 walked independently (with or without walking aids) at admission spent a median of 17 hours a day  
72 in bed and walked less than 1 hour a day during hospitalization.[8] This low level of mobility  
73 during hospitalization in older medical patients poses a high risk of self-reported functional  
74 decline.[9] Studies of older medical patients have shown that patients who lose functional capacity  
75 during hospitalization have reduced ability to recover the lost function.[5, 10] Accordingly, many  
76 older medical patients experience sustained functional limitations after hospitalization, placing them  
77 at increased risk of further functional decline, which can lead to dependency in activities of daily  
78 living, increased fall episodes and mortality.[5, 7, 11]

79 Interventions that improve mobility during hospitalization are therefore important.  
80 However, research has shown that it is a challenge to achieve increased mobility during  
81 hospitalization in older patients.[4] Studies report several reasons for these difficulties: lack of  
82 space, medical equipment restricting out of bed mobility, lack of assistive devices and help from  
83 staff, lack of patient motivation, patient weakness and pain, and different views on health  
84 professionals' roles concerning the task of mobilizing patients.[12]

1  
2  
3  
4 85 Being mobile is complex and influenced by environmental factors (such as weather  
5  
6 86 conditions and access to infrastructure), internal factors (such as level of motivation, fear of falling),  
7  
8 87 and social support (by peers or family).[13] Systematic reviews investigating determinants for  
9  
10 88 increased mobility in older people have shown that older people believe that increased mobility can  
11  
12 89 improve physical and mental well-being.[14, 15] However, many barriers to achieving increased  
13  
14 90 mobility behaviour have been identified, such as lack of knowledge about the importance of  
15  
16 91 mobility, insufficient social support, negative attitudes towards mobility, competing priorities,  
17  
18 92 unfavourable beliefs and various personality traits.[14, 15]

21  
22 93 Addressing mobility is considered to be a core task for physiotherapists working with older  
23  
24 94 hospitalized patients.[16] However, the complexity of physiotherapy practice has increased as a  
25  
26 95 result of changes in health care, for example, high patient turnover places higher demands on  
27  
28 96 physiotherapists to ensure effective management of patients.[17] Thus, time and temporality  
29  
30 97 become barriers to continuously support the mobility of older medical patients during  
31  
32 98 hospitalization.

33  
34  
35  
36 99 In most Danish hospitals, physiotherapists are not part of the permanent staff employed in  
37  
38 100 the medical departments. Therefore, the physiotherapists only visit these departments in the daytime  
39  
40 101 to carry out tasks related to the mobility of referred patients. Thus, surveillance of ongoing mobility  
41  
42 102 in hospitalized patients tends to be lowered after the physiotherapist has left the department.[4, 12,  
43  
44 103 18] Hence, nurses hold a key position in supporting mobility in older patients. However, nurses do  
45  
46 104 not consider mobility a prioritized nursing care activity[19] or part of their core tasks.[12]  
47  
48 105 Numerous barriers to nurses and physicians' efforts to improve mobility in patients have been  
49  
50 106 identified.[4] These include concerns about mobility-related falls or fall injuries and doubts  
51  
52 107 regarding the patients' motivation for mobility during acute illness. Thus, nurses and physicians do  
53  
54  
55  
56  
57  
58  
59  
60

1  
2  
3  
4 108 not encourage older medical patients to be mobile.[4] At the organizational level, the barriers  
5  
6 109 include lack of staff and time.[12] Thus, based on different professional perspectives and priorities,  
7  
8 110 there seems to be a paradox regarding mobility of older medical patient: physiotherapists perceive  
9  
10 111 improved mobility as an important task to prevent functional decline, but nurses and other health  
11  
12 112 professionals, who spend the most time with patients, do not consider patient mobility a core task  
13  
14 113 and tend to focus on medical procedures and patient flow.[20] Hence, patient mobility is dependent  
15  
16 114 on several factors, such as the efforts and beliefs of more than one group of health professionals,  
17  
18 115 and on complex factors such as patients' knowledge, motivation and attitude.

21  
22 116 Consequently, interventions that take the multiple barriers to older patients' mobility into  
23  
24 117 account are needed. An intervention that is developed from a user perspective and is adapted to the  
25  
26 118 local context is more likely to be successful.[21] A growing body of evidence shows that patient  
27  
28 119 engagement can yield better health outcomes,[22] contribute to improvements in health care quality  
29  
30 120 and patient safety,[23] and lead to research findings that are more pertinent to the users' concerns  
31  
32 121 and dilemmas.[21] Nevertheless, user engagement is not common at the design phase of  
33  
34 122 interventions. Instead, an intervention is typically designed on the basis of the literature, and only  
35  
36 123 rarely incorporates knowledge, skills and experiences from, for example, health professionals.[24]

37  
38  
39  
40 124 The aim of this protocol paper is to describe the intervention design of WALK-Copenhagen  
41  
42 125 (WALK-Cph), a mixed-methods clinical project aimed at increasing mobility in older medical  
43  
44 126 patients during acute hospitalizations and after discharge. The qualitative part of the study began in  
45  
46 127 January 2017. The intervention design is based on a series of qualitative studies that are outlined  
47  
48 128 below. A schematic presentation of the whole WALK-Cph project is provided in figure 1.



## 129 **PHILOSOPHY OF SCIENCE**

130 WALK-Cph is inspired by a critical realistic approach that focuses our attention on the  
131 search for generative mechanisms that explain the social world. Realism as a philosophy of science  
132 is situated between the extremes of positivism and relativism[25] and acknowledges that the world  
133 is an open system with structures and layers that interact to form mechanisms and contexts. Thus,  
134 we are interested in (1) identifying, analysing and understanding the social world of health  
135 professionals regarding mobilization of older medical patients and (2) health professionals’  
136 responses to different resources offered within new interventions. The focus is on understanding the  
137 complicated layers that exist below the surface and explaining health professionals’ reasoning in  
138 their actions and reactions. Ontologically, critical realism builds on the assumption that features that  
139 form our world are not essentially visible and that reality exists independently of what is perceived.  
140 [25]

141 In a critical realistic view, the world, i.e. in this study the medical departments, is divided  
142 into three domains: (1) the empirical domain (events and phenomena that can be perceived  
143 objectively); (2) the actual domain (events and phenomena that take place regardless of whether  
144 they can be perceived or not, but which are affecting the empirical domain); and (3) the real domain  
145 (structures and generative mechanisms, for example, power, political decisions, and relationships).  
146 Thus, reality is layered like an iceberg extending beneath the surface where it is not visible to the  
147 eye. In a critical realistic approach, science is about exploring the third domain, the real domain. It  
148 is about going from experiencing a phenomenon and what is immediately perceived to  
149 understanding and explaining which structures and mechanisms create the phenomenon. However,  
150 interdependency exists, which means that our interpretation of the real world influences our actions,  
151 which in turn can influence reality.[25]

1  
2  
3  
4 152 Adopting a critical realism position allows us to focus on the interaction between actors and  
5  
6 153 structures over time. A realistic methodology consists of a number of phases. In connection with  
7  
8 154 mobility of older medical patients, the first phase will be to clarify the purpose of the research to  
9  
10 155 understand what constitutes mobility of older medical patients. Second, empirical data on the  
11  
12 156 phenomenon, i.e. mobility (movement sensor data, field study and barrier screening) will be  
13  
14 157 collected. The third step will be to abduct the structures, the potential forces as well as the  
15  
16 158 mechanisms that tend to trigger the forces of the inherent phenomenon (i.e. mobility). Abduction, in  
17  
18 159 the sense of this protocol, means creating new concepts, hypotheses, models or theories about  
19  
20 160 mobility that are not known in advance. In this process, the three domains will be combined.  
21  
22 161 Finally, the preliminary new knowledge will be presented at workshops for health professionals and  
23  
24 162 other researchers as a verification process. If the participants can associate with the new concepts,  
25  
26 163 models or hypotheses, a sound basis for the new knowledge to be used in practice will have been  
27  
28 164 created. In a classic critical realistic research process, this approach is quite linear, but in this  
29  
30 165 project, the process will appear cyclically, to further support the possibilities for implementation.  
31  
32  
33  
34 166 [36]

### 167 **The concept of mobility**

168 In WALK-Cph, mobility is defined in accordance with Satariano et al.,[26] who state that  
169 mobility refers to “Movement in all of its forms, including basic ambulation, transferring from a  
170 bed to a chair, walking for leisure and the completion of daily tasks, engaging in activities  
171 associated with work and play, exercising, driving a car, and using various forms of public  
172 transport.” In addition, our definition of mobility includes mobilization, as many activities in and  
173 around patients in a medical department also relate to passive transfer. Therefore, in WALK-Cph,  
174 mobility refers to situations where the individual is actively involved in movement and situations  
175 where the individual is passively moved, for example, moved around in the bed.

## 176 **STUDY DESIGN**

177 The WALK-Cph is a pragmatic cross-sectoral and mixed-methods project with the overall  
178 aim of increasing 24-hour mobility in older patients during acute hospitalization and after discharge.  
179 The primary outcome for the WALK-Cph study is increased mobility and will be estimated as steps,  
180 transitions, or upright time, based on thigh-worn accelerometry using activPAL3 activity monitors  
181 (PAL Technologies Ltd., Glasgow, UK). Whether the primary outcome will be expressed as steps,  
182 transitions, or upright time depends on the initial pilot and feasibility testing of the intervention, the  
183 outcomes and other trial procedures (study 2a and 2c, figure 1) to help qualify the randomized  
184 controlled trial (RCT; study 3a, figure 1) of the WALK-Cph project. The intervention is based on an  
185 assumption that by tailoring the intervention to the local context, the likelihood of successful  
186 implementation will increase.[21,27] This will be done by developing and co-designing the  
187 intervention in collaboration with key stakeholders such as patients, relatives, health professionals  
188 and researchers, in accordance with the BMJ campaign “Partnering with patients”  
189 ([http://www.bmj.com/company/qip\\_examples/partnering-with-patients/](http://www.bmj.com/company/qip_examples/partnering-with-patients/)). A tailored intervention is  
190 defined as an intervention in which the identification of barriers has been undertaken before the  
191 design and delivery of the intervention. [21]

192 The design of the intervention was inspired by the Medical Research Council (MRC)  
193 framework for the development and evaluation of complex interventions to improve health.[24]  
194 However, instead of first conducting an intervention study to ascertain clinical effectiveness and  
195 then considering implementation, WALK-Cph is designed both as an intervention and an  
196 implementation study, a so-called hybrid design.[28] This means that the implementation study is  
197 planned from the outset. Hybrid design has been advocated to improve the speed of generating new  
198 knowledge and to increase the benefit and uptake of clinical research. [28]

1  
2  
3  
4 199 In four studies, we will design (phase 1), fidelity test (phase 2), impact test (phase 3) and  
5  
6 200 measure adoption (phase 4) of the intervention (figure 1). After an initial observational study, the  
7  
8 201 health professionals from two intervention departments will be asked to participate in workshops  
9  
10 202 and focus group interviews during the full study period (figure 1).

11  
12  
13 203 In order to achieve the overall project aim, the following research questions will be  
14  
15 204 addressed in the qualitative studies of WALK-Cph:

- 16  
17  
18 205 1. What current cultural practices exist for mobility of older medical patients in the medical  
19  
20 206 departments?  
21  
22 207 2. What are the roles of different professional cultures both regarding mobility of older patients  
23  
24 208 and regarding collaboration between different professional groups to achieve increased mobility  
25  
26 209 in older patients during and after hospitalization?  
27  
28 210 3. How can we develop a patient intervention that is tailored to local cultural practices and based  
29  
30 211 on a high degree of user engagement by health professionals, patients and their relatives?  
31  
32 212 4. How does a tailored patient intervention influence the extent to which health professionals and  
33  
34 213 patients adhere to recommendations for managing increased mobility in older patients during  
35  
36 214 and after hospitalization?  
37  
38  
39  
40

## 41 215 **Study setting**

42  
43 216 WALK-Cph will be carried out in Denmark where the health care system is public funded  
44  
45 217 by tax payers. The Danish welfare state provides free treatment for primary medical care, hospitals,  
46  
47 218 and home-based care services for all citizens. WALK-Cph will be conducted at four medical  
48  
49 219 departments in three public hospitals in the capital region of Copenhagen, Denmark. In addition,  
50  
51 220 physical therapy departments, a municipality and a municipality-based rehabilitation centre will  
52  
53 221 participate.  
54  
55  
56  
57  
58  
59  
60

1  
2  
3  
4 222 WALK-Cph will use a purposeful sampling approach[29] to reflect the diversity in medical  
5  
6 223 specialties and to obtain rich information concerning the mobility practice for medical patients. We  
7  
8 224 will select departments that reflect many facets of the medical specialty rather than focusing on one  
9  
10 225 specialty. We will include medical departments where older medical patients are admitted and  
11  
12 226 where increased mobility is expected to be one of the core tasks of care and treatment. Four  
13  
14 227 different departments will be chosen to participate: (1) a department of endocrinology; (2) a  
15  
16 228 department of infectious and pulmonary diseases; (3) a department of gastroenterology; and (4) a  
17  
18 229 general medical department. Each chosen department will have between 18 and 40 beds with  
19  
20  
21 230 similar numbers and proportions of physicians, registered nurses and certified nursing assistants. In  
22  
23 231 all hospitals, the physical therapy service is centrally organized to service all wards.

## 232 **METHODS AND ANALYSES**

233 The qualitative methods will include an ethnographic field study, participant observation,  
234 interviews and workshops. These methods have been chosen because they are well suited for  
235 providing in-depth relational knowledge for designing an appropriate patient intervention.[30]  
236 Furthermore, qualitative methods are also appropriate to obtain knowledge about the contextual  
237 circumstances with regard to the implementation, delivery and evaluation of an intervention. By  
238 using qualitative methods, we will be able to account for the context in which events occur and  
239 uncover social patterns; for example, which relationships are important for actions related to  
240 mobility and for interventions that increase mobility. Qualitative methods are also valuable for  
241 exploring the underlying assumptions in relation to the designed intervention and identifying the so-  
242 called active ingredients of a complex intervention [24] required to achieve increased mobility.  
243 Finally, qualitative studies make it possible to determine which groups of participants are most  
244 likely to respond positively to the designed intervention, whether the intervention must be modified

1  
2  
3  
4 245 in different ways for different groups or departments, or whether it should not be used at all for  
5  
6 246 certain groups of people.[31,32]  
7  
8

### 9 247 **Ethnographic field study**

10  
11 248 The design phase (figure 1) will begin with an ethnographic field study, including  
12  
13 249 participant observation.[33-36] Our position will primarily be as observers rather than  
14  
15 250 participants.[35]. The field study will enable us to generate rich descriptions of the interactions  
16  
17 251 between health professionals and patients and explore the importance of contextual factors,  
18  
19 252 professional identities and professional boundaries for mobility of older medical patients in the  
20  
21 253 departments. This is crucial because observational knowledge relating to mobility of older medical  
22  
23 254 patients in the departments is sparse. By being physically present in the department, taking part in  
24  
25 255 and observing the health professionals carrying out their daily activities, we will be able to  
26  
27 256 understand how mobility of older patients is practiced in the departments and how it is perceived by  
28  
29 257 different participants.[31]  
30  
31  
32  
33

34 258 We have chosen a focused observation strategy,[29, 36] whereby we will follow the health  
35  
36 259 professionals (physiotherapists, nurses, nursing assistants and physicians) in their daily work with a  
37  
38 260 particular focus on language, actions and materialities regarding mobility of patients. We will  
39  
40 261 inquire into what is being done and into arguments for decisions that the health professionals make  
41  
42 262 about mobility in concrete situations.  
43  
44  
45

46 263 The observations will be carried out by the researchers, two of whom are trained nurses  
47  
48 264 (MSN) and two are trained physiotherapists (MHSc). By choosing researchers with different  
49  
50 265 professional backgrounds, we acknowledge that the ability to gather data and generate knowledge  
51  
52 266 depends on the position of the researcher. [35] However, we anticipate that by comparing our  
53  
54 267 observations, we will become aware of our own positions and perspectives and how they frame our  
55  
56  
57  
58  
59  
60

1  
2  
3  
4 268 observations. Thus, by cross-checking and discussing our observations, we can sharpen our  
5  
6 269 attention on differences of significance for data generation. This process will take place  
7  
8 270 continuously during meetings after each observation period to cross-check data and interpretations  
9  
10 271 and will strengthen the validity of the results. [31] By systematizing the observations and creating  
11  
12 272 transparency, the observations will have credibility [33, 35] and allow us to explore and understand  
13  
14 273 how health professionals make decisions about mobility in interactions with the patients and each  
15  
16 274 other.

17  
18  
19  
20 275 We will use an observation guide to record activities and interactions. Field notes will  
21  
22 276 consist of both non-verbal and verbal observations such as body language, dialogue between the  
23  
24 277 health professionals and patients, and the use of material artefacts such as mobility aids. Dialogues  
25  
26 278 will be written down as close to verbatim as possible.[31]

27  
28  
29 279 The observation guide will also include descriptive data (e.g. sex, profession and  
30  
31 280 professional experience) and questions like “Who initiated mobility?”, “What arguments are raised  
32  
33 281 when patients’ needs for mobility are rejected or accepted?”, “Is any kind of material artefact used,  
34  
35 282 such as a walker or a screening tool?” According to Mason,[32] field notes should also include  
36  
37 283 focus areas of “subjective capabilities”. The intention is that the researcher writes down reflections  
38  
39 284 on his or her own actions, attitudes, location and presence. This increases the understanding of how  
40  
41 285 the researchers affect the relations, underscoring that neutrality and detachment in relation to data  
42  
43 286 collection, analysis and interpretation is impossible.

### 44 45 46 47 48 287 **Analytical perspective**

49  
50 288 We will analyse our observational data using different theories: cultural learning processes,  
51  
52 289 the theory of common knowledge and cultural historical activity theory.[37-42] These theories can  
53  
54 290 help us understand contradictions and transformations in the collaborations among the health  
55  
56  
57

1  
2  
3  
4 291 professionals, structures and artefacts, and how cultural processes that create ideas about how  
5  
6 292 culturally experienced participants,[39], for example, the nurses, should interpret and act in relation  
7  
8 293 to mobility in a particular cultural world (in the department).  
9

10  
11 294 WALK-Cph derives its concept of culture from the theories of cultural learning processes  
12  
13 295 that understand culture not only as a homogeneous set of assumptions, attitudes and values that all  
14  
15 296 health professionals possess.[43-45 ] Rather, culture is understood as something the health  
16  
17 297 professionals produce in order to create links and connections between materialities and meanings  
18  
19 298 in social and physical spaces.[37] This means that culture does not refer to cognitive processes only;  
20  
21 299 culture is also enacted and has bodily elements embedded. This concept of culture is relevant when  
22  
23 300 we use observational studies, where we can observe how the health professionals act, what they say,  
24  
25 301 what materialities they include and exclude in their professional practice, and how they move in  
26  
27 302 physical rooms. In this perspective, the concept of culture focuses on both what is homogeneous  
28  
29 303 and what is different, for example, between professions.[38]  
30  
31  
32

33  
34 304 Data from the ethnographic field study will be analysed using both a thematic analysis and a  
35  
36 305 deductive approach where we analyse the material from the perspective of different theoretical  
37  
38 306 concepts, for example, as cultural models,[37] common knowledge[40] and activity systems.[41]  
39  
40

41 307 The results from the analysis will be presented and used as mirror data in the subsequent  
42  
43 308 workshop (figure 1). Mirror data are defined as data representing the present state of work practices,  
44  
45 309 providing the health professionals with a mirror reflection of their activities by presenting examples  
46  
47 310 of current practice.[42]  
48  
49  
50  
51  
52  
53  
54  
55  
56  
57  
58  
59  
60



## 311 **The workshops**

312 After the field study, four workshops, each lasting four hours, will be used to develop the  
313 WALK-Cph intervention in collaboration with health professionals, patients, relatives and  
314 researchers. In the workshops, we will get an opportunity to bring together different forms of  
315 evidence-based knowledge, both theoretical and empirical, to accommodate increased mobility of  
316 older medical patients.[41] The workshop method has been chosen because implementation  
317 research points to the importance of involving the people who are responsible for increasing the  
318 mobility of older medical patients, in this case the health professionals.[46] Each workshop will be  
319 held in a classroom in the hospital and will be video- and audiotaped. The design phase consists of  
320 three workshops.

### 321 Workshop I: health professionals

322 Health professionals from the intervention departments and the municipality will participate.  
323 The aim of this workshop is to develop a catalogue of initiatives that the health professionals  
324 believe will increase the mobility of older medical patients. The catalogue will be based on the  
325 health professional's knowledge, experience and attitudes as well as observational data from the  
326 field study. The proposed initiatives will form the basis for the development of the intervention.

### 327 Workshop II: patients and relatives

328 Patients and their relatives will participate. Workshop II has two aims: (1) to generate a  
329 catalogue of initiatives that the patients and the relatives believe will increase mobility based on  
330 their knowledge, experience, attitudes and mirror data; (2) to obtain feedback from the patients and  
331 their relatives on the catalogue of initiatives suggested by the health professionals at workshop I.  
332 The initiatives suggested by patients and relatives will also contribute to the development of the  
333 intervention. The results from workshop II will have as much weight as the results from workshop I.

1  
2  
3  
4 334 Workshop III: health professionals

5  
6 335 Health professionals will participate and be introduced to the patients' and the relatives'  
7  
8 336 proposals. The particular aim of workshop III will be to finalize a prototype of the intervention. A  
9  
10 337 study focusing on facilitators and barriers (barrier screening) will then be performed and the  
11  
12 338 intervention will be adjusted according to these results before being tested in a feasibility study  
13  
14 339 (study 2, figure 1). After the design phase, one more workshop will take place.

15  
16  
17  
18 340 Workshop IV: health professionals, patients and relatives.

19  
20 341 Health professionals, patients and relatives will participate to provide feedback. Workshop  
21  
22 342 IV will take place after the fidelity study (figure 1) and the aim will be to inform the health  
23  
24 343 professionals, the patients and the relatives about which parts of the intervention were feasible in  
25  
26 344 clinical practice and which aspects might need to be adapted, and also to receive feedback from  
27  
28 345 health professionals, patients and relatives. The final intervention will then be adapted and designed  
29  
30 346 before testing in an RCT.

31  
32  
33  
34 347 Between the different workshops, the research team will work systematically to develop the  
35  
36 348 intervention. The study follows Rothman and Edwin's[27] proposed five-phase model for design of  
37  
38 349 interventions: (1) problem analysis and project planning, (2) information gathering and synthesis,  
39  
40 350 (3) design, (4) pilot testing and (5) evaluation. As a part of the workshops and the barrier screening,  
41  
42 351 input from health professionals, patients and relatives will be collected and the research team will  
43  
44 352 score the feasibility of all incoming input based on a number of criteria: rationality, complexity,  
45  
46 353 compliance with rules and regulations, required time, economic neutrality, accessibility of  
47  
48 354 equipment and amelioration of patient life quality. Inspired by the Delfi method,[47] all input will  
49  
50 355 be scored between 1 and 5, where 1 represents low complexity and 5 represents high complexity.  
51  
52 356 All interventions that have a median score equal to or less than 2 will be included in the final  
53  
54  
55  
56  
57  
58  
59  
60

1  
2  
3  
4 357 intervention. The intervention model will be presented at workshops II–IV, where input from the  
5  
6 358 participants will serve to modify the design of the intervention into a final version.  
7  
8

### 9 359 **The participants**

10  
11 360 The participants in workshops II and IV will include 8–10 older medical patients (>65  
12  
13 361 years) who have been admitted to a medical department and 8–10 relatives who have had a relative,  
14  
15 362 friend or family member (>65 years) admitted to a medical department. The participants in  
16  
17 363 workshops I, III, IV and IV will include physicians, nurses and nursing assistants, physiotherapists,  
18  
19 364 occupational therapists and leaders affiliated with the two intervention departments or the  
20  
21 365 municipalities. The health professionals will be selected by their managers and will be selected  
22  
23 366 based on profession, experience in the medical or physiotherapy department and being responsible  
24  
25 367 for implementing the intervention. The selection is also inspired by Roger's five categories of  
26  
27 368 users.[48] The five categories range from enthusiastic people who are good at initiating and  
28  
29 369 managing interventions, even beyond their own department, to those who have a strong voice  
30  
31 370 within the department and finally, those with the greatest resistance towards the intervention. This  
32  
33 371 complexity of participants ensures a multi-voiceness perspective [41] on both possibilities and  
34  
35 372 barriers in relation to designing an intervention that has the ability to match the local context. This  
36  
37 373 selection will be performed in collaboration with the first-line managers from the departments.  
38  
39  
40  
41  
42

### 43 374 **Barrier screening**

44  
45 375 Barrier screening designed as semi-structured individual interviews with health  
46  
47 376 professionals will be carried out in the two intervention departments, the physiotherapy departments  
48  
49 377 and the municipalities after the intervention has been designed. The aim of barrier screening is to  
50  
51 378 explore and understand the health professionals' perceived barriers and facilitators regarding the  
52  
53 379 intervention, once it has been designed (figure 1). Barrier screening will complement the field  
54  
55  
56  
57  
58  
59  
60

1  
2  
3  
4 380 studies at the organizational level and the workshop at the group level. Twenty interviews will be  
5  
6 381 conducted with health professionals from the medical intervention departments who have not  
7  
8 382 participated in the workshops. Barrier screening will support and ensure that the intervention is  
9  
10 383 based on opinions, attitudes and perspectives from health professionals and positions other than  
11  
12 384 those who participate in the workshops. Both contradictory and complementary views are relevant  
13  
14 385 for identifying patterns in the participants' understanding, practices and how they relate to situations  
15  
16 386 involving mobility of older medical patients.

17  
18  
19  
20 387 Barrier screening will be designed and analysed based on the Theoretical Domain  
21  
22 388 Framework (TDF) [49,50] and Rogers' framework of innovation attributes. [48] The purpose of the  
23  
24 389 TDF is to identify determinants at an individual level. TDF includes 128 constructs in 12 domains  
25  
26 390 derived from 33 theories of social-cognitive behaviour change. Rogers' innovation attributes  
27  
28 391 concern a number of perceived characteristics of innovations, which influence their adoption and  
29  
30 392 use, including an innovation's relative advantage compared with routine practice, compatibility  
31  
32 393 with the pre-existing system, complexity, trialability or testability, potential for reinvention and  
33  
34 394 observed effects. Interventions that do not meet these criteria tend to be difficult to disseminate and  
35  
36 395 implement.

## 396 **ETHICS AND DISSEMINATION**

397  
398 Before undertaking observations, interviews and workshops, all participants will be  
399 informed about the aim of the study. They will be assured that participation is voluntary and that the  
400 results will be anonymous. All participants will be asked to provide written, voluntary and informed  
401 consent before participation in the workshops and interviews. Anonymity will be ensured by  
402 assigning participants a code instead of using their full names in field notes and interviews. Only  
persons who are part of the research team will have access to data. The project will adhere to the

1  
2  
3  
4 403 directives of the Helsinki Declaration.[51] Ethical approval was not required for the study because  
5  
6 404 formal ethical approval is not mandatory for studies that do not involve biomedical issues (I-Suite  
7  
8 405 no. 05078) according to Danish law.  
9

10  
11 406 After completing the study, the results will be disseminated to all the health professionals,  
12  
13 407 managers, patients and relatives. They will be invited to afternoon meetings where the findings, the  
14  
15 408 process and cooperation will be the focus. The results from this study will be published in peer-  
16  
17 409 reviewed scientific journals and presented at one or more scientific conferences.  
18  
19  
20

## 21 410 **Summary**

22  
23  
24 411 This protocol paper describes the WALK-Cph project, which is aimed at developing and  
25  
26 412 implementing an intervention to increase mobility in older medical patients during acute  
27  
28 413 hospitalizations and after discharge. Few previous studies have reported on the contribution of  
29  
30 414 qualitative research to select, design and model interventions.[24] WALK-Cph is being designed on  
31  
32 415 the premise that an intervention that is developed with contributions from the perspective of the  
33  
34 416 users and is adapted to the local context is more likely to be implemented.[21] Therefore, the  
35  
36 417 WALK-Cph intervention will be developed in collaboration with patients, relatives, researchers and  
37  
38 418 health professionals. This collaboration makes it possible to use different experiences, skills,  
39  
40 419 knowledge and expertise in the study while recognizing that the participants' local knowledge  
41  
42 420 improves the external validity of the intervention.[27] We therefore believe that the WALK-Cph  
43  
44 421 study can make valuable methodological contributions to intervention research.  
45  
46  
47  
48  
49  
50  
51  
52  
53  
54  
55  
56  
57  
58  
59  
60

## 422 **Acknowledgements**

423 We thank the management staff from the medical departments, the physiotherapy and  
424 occupational therapy departments and the municipality for their commitment to participate in the  
425 study and give us the opportunity to conduct field studies in their departments.

## 426 **Contributors**

427 JWK led the study, and drafted the manuscript in collaboration with ACB, TT-T, PN, MMP.  
428 TB, RSH, OA, JP, LK extensively revised the manuscript. All authors have approved the final  
429 manuscript and are willing to take responsibility for appropriate portions of the content.

## 430 **Funding**

431 This work was funded by the Velux Fonden (Lauritz William Foundation) grant number  
432 [00013449].

## 433 **Competing interests**

434 None.

## 435 **Provenance and peer review**

436 Not commissioned; internally peer reviewed.

## 437 **REFERENCES**

438 1. Dock W. The evil sequelae of complete bed rest. *JAMA* 1944;125:1083–5.

- 1  
2  
3  
4 439 2. Danmark, Sundhedsstyrelsen. Styrket indsats for den ældre medicinske patient: fagligt  
5  
6 440 oplæg til en national handlingsplan. Sundhedsstyrelsen; 2011.  
7
- 8  
9 441 3. Carpenter CR, Shelton E, Fowler S, et al. Risk factors and screening instruments to predict  
10  
11 442 adverse outcomes for undifferentiated older emergency department patients: a systematic  
12  
13 443 review and meta-analysis. *Acad Emerg Med* 2015;22:1–21.  
14
- 15  
16 444 4. Brown CJ, Williams BR, Woodby LL, et al. Barriers to mobility during hospitalization from  
17  
18 445 the perspectives of older patients and their nurses and physicians. *J Hosp Med* 2007;2:305–  
19  
20 446 13.  
21
- 22  
23 447 5. Boyd CM, Landefeld CS, Counsell SR, et al. Recovery of activities of daily living in older  
24  
25 448 adults after hospitalization for acute medical illness: functional recovery after  
26  
27 449 hospitalization. *J Am Geriatr Soc* 2008;56:2171–9.  
28
- 29  
30 450 6. Gill TM, Allore HG, Holford TR, et al. Hospitalization, restricted activity, and the  
31  
32 451 development of disability among older persons. *JAMA* 2004;292:2115–24.  
33
- 34  
35 452 7. Boyd CM, Xue Q-L, Guralnik JM, Fried LP. Hospitalization and development of  
36  
37 453 dependence in activities of daily living in a cohort of disabled older women: the Women's  
38  
39 454 Health and Aging Study I. *J Gerontol A Biol Sci Med Sci* 2005;60:888–93.  
40
- 41  
42 455 8. Pedersen MM, Bodilsen AC, Petersen J, et al. Acute twenty-four-hour mobility during acute  
43  
44 456 hospitalization in older medical patients. *J Am Geriatr Soc* 2013;68:331–7.  
45
- 46  
47 457 9. Zisberg A, Shadmi E, Sinoff G, et al. Low mobility during hospitalization and functional  
48  
49 458 decline in older adults: in-hospital mobility levels and functional decline. *J Am Geriatr Soc*  
50  
51 459 2011;59:266–73.  
52
- 53  
54 460 10. Brown CJ, Friedkin RJ, Inouye SK. Prevalence and outcomes of low mobility in  
55  
56 461 hospitalized older patients. *J Am Geriatr Soc* 2004;52:1263–70.  
57

- 1  
2  
3  
4 462 11. Callen BL, Mahoney JE, Grieves CB, et al. Frequency of hallway ambulation by  
5  
6 463 hospitalized older adults on medical units of an academic hospital. *Geriatr Nurs (Lond)*  
7  
8 464 2004;25:212–17.  
9  
10  
11 465 12. Doherty-King B, Yoon JY, Pecanac K, et al. Frequency and duration of nursing care related  
12  
13 466 to older patient mobility: nursing care related to mobility. *J Nurs Scholarsh* 2014;46:20–7.  
14  
15 467 13. Dishman RK, Sallis JF, Orenstein DR. The determinants of physical activity and exercise.  
16  
17 468 *Public Health Rep* 1985;100:158–71.  
19  
20 469 14. Baert V, Gorus E, Mets T, et al. Motivators and barriers for physical activity in the oldest  
21  
22 470 old: a systematic review. *Ageing Res Rev* 2011;10:464–74.  
24  
25 471 15. Franco MR, Tong A, Howard K, et al. Older people’s perspectives on participation in  
26  
27 472 physical activity: a systematic review and thematic synthesis of qualitative literature. *Br J*  
28  
29 473 *Sports Med* 2015;[10.1136/bjsports-2014-094015](https://doi.org/10.1136/bjsports-2014-094015).  
31  
32 474 16. Brown CJ, Flood KL. Mobility limitation in the older patient: a clinical review. *JAMA*  
33  
34 475 2013;310:1168.  
36  
37 476 17. Nilsen P, Bernhardsson S. Towards evidence-based physiotherapy - research challenges and  
38  
39 477 needs. *J Physiother* 2013;59:143–4.  
40  
41 478 18. So C, Pierluissi E. Attitudes and expectations regarding exercise in the hospital of  
42  
43 479 hospitalized older adults: a qualitative study. *J Am Geriatr Soc* 2012;60:713–18.  
45  
46 480 19. Kalisch BJ, Tschannen D, Lee H, et al. Hospital variation in missed nursing care. *Am J Med*  
47  
48 481 *Qual* 2011;26:291–9.  
50  
51 482 20. Kirk JW, Nilsen P. Implementing evidence-based practices in an emergency department:  
52  
53 483 contradictions exposed when prioritizing a flow culture. *J Clin Nurs* 2015;25:555–6.  
55  
56  
57  
58  
59  
60



- 1  
2  
3  
4 484 21. Baker R, Camosso-Stefinovic J, Gillies C, et al. Tailored interventions to overcome  
5  
6 485 identified barriers to change: effects on professional practice and health care outcomes.  
7  
8 486 *Cochrane Database Syst Rev* 2010;(3):CD005470.  
9  
10  
11 487 22. Carman KL, Dardess P, Maurer M, et al. Patient and family engagement: a framework for  
12  
13 488 understanding the elements and developing interventions and policies. *Health Aff*  
14  
15 489 *(Millwood)* 2013;32:223–31.  
16  
17  
18 490 23. Jansen YJFM, Foets MME, de Bont AA. The contribution of qualitative research to the  
19  
20 491 development of tailor-made community-based interventions in primary care: a review. *Eur J*  
21  
22 492 *Public Health* 2010;20:220–6.  
23  
24  
25 493 24. MRC. A Framework for the Development and Evaluation of RCTs for Complex  
26  
27 494 Interventions to Improve Health. Report no. 200018. London: Medical Research Council;  
28  
29 495 2000.  
30  
31  
32 496 25. Bhaskar R. A Realist Theory of Science. Hemel Hempstead, Herts: Harvester Wheatsheaf;  
33  
34 497 1975.  
35  
36  
37 498 26. Satariano WA, Guralnik JM, Jackson RJ, et al. Mobility and aging: new directions for public  
38  
39 499 health action. *American Journal of Public Health* 2012;8:1508-1515  
40  
41 500 27. Rothman J, Edwin JT. Intervention Research: Design and Development for Human Services.  
42  
43 501 New York: Haworth Press; 1994.  
44  
45  
46 502 28. Curran GM, Bauer M, Mittman B, et al. Effectiveness-implementation Hybrid Designs:  
47  
48 503 Combining Elements of Clinical Effectiveness and Implementation Research to Enhance  
49  
50 504 Public Health Impact. *Medical Care* 2012;3:217-226  
51  
52  
53 505 29. Wolcott HF. Confession of a “trained” observer. In: Transforming Qualitative Data.  
54  
55 506 Description, Analysis and Interpretation. Thousand Oaks, CA: Sage Publications; 1994.  
56  
57  
58  
59  
60

- 1  
2  
3  
4 507 30. Berg BL. *Qualitative Research Methods for the Social Sciences*. 3rd ed. Boston, MA: Allyn  
5  
6 508 and Bacon; 1998.
- 7  
8  
9 509 31. Hastrup K, Rubow C, Tjørnhøj-Thomsen T. *Kulturanalyse. Kort fortalt*. Vol. 2011.  
10  
11 510 Frederiksberg C, København: Samfundslitteratur; 2011.
- 12  
13 511 32. Mason J. *Qualitative Researching*. London: Sage; 1996.
- 14  
15  
16 512 33. Hastrup K. *Ind i verden: en grundbog i antropologisk metode*. Copenhagen: Hans Reitzel;  
17  
18 513 2003.
- 19  
20  
21 514 34. Spradley JP. *The Ethnographic Interview*. London: Holt, Rinehart & Winston.
- 22  
23 515 35. Spradley JP. *Participant observation*. Long Grove, IL: Waveland Press; 1980.
- 24  
25  
26 516 36. Tjørnhøj-Thomsen T, Whyte SR. Fieldwork and participant observation. In: Vallgård S,  
27  
28 517 Koch L, editors. *Research Methods in Public Health*. Copenhagen: Gyldendal Akademisk;  
29  
30 518 2008, p 91–120.
- 31  
32  
33 519 37. Hasse C. *Kulturanalyse i organisationer. Begreber, metoder og forbløffende læreprocesser*  
34  
35 520 Frederiksberg: Samfundslitteratur; 2011.
- 36  
37  
38 521 38. Hasse C. *Kultur i bevægelse. Fra deltagerobservation til kulturanalyse – i det fysiske rum*.  
39  
40 522 Frederiksberg: Samfundslitteratur; 2002
- 41  
42  
43 523 39. Hasse C. *An Anthropology of Learning: on Nested Frictions in Cultural Ecologies*. New  
44  
45 524 York: Springer; 2014.
- 46  
47  
48 525 40. Edwards A. Building common knowledge at the boundaries between professional practices:  
49  
50 526 relational agency and relational expertise in systems of distributed expertise. *Int J Educ Res*  
51  
52 527 2011;50:33–9.
- 53  
54  
55  
56  
57  
58  
59  
60

- 1  
2  
3  
4 528 41. Engeström Y. Learning-by-Expanding. An Activity-Theoretical Approach to Developmental  
5  
6 529 Research. Helsinki: Orienta-Konsultit; 1987.  
7  
8  
9 530 42. Kerosuo H, Engeström Y, Kajamaa A. Promoting innovation and learning through Change  
10  
11 531 Laboratory: an example from Finnish health care. *Cent Eur J Public Policy* 2010;4:110–31.  
12  
13 532 43. Weick KE. Organizational culture as a source of high reliability. National Emergency  
14  
15 533 Training Center; 1987. Available from: [http://www.aml-](http://www.aml-safety.com.au/AMLstores/_images/pdf-files/Weick1987.pdf)  
16  
17 534 [safety.com.au/AMLstores/\\_images/pdf-files/Weick1987.pdf](http://www.aml-safety.com.au/AMLstores/_images/pdf-files/Weick1987.pdf) (accessed 17 December 2015).  
18  
19  
20 535 44. Schein EH. Process Consultation: Its Role in Organization Development. Reading, MA:  
21  
22 536 Addison-Wesley; 1969.  
23  
24  
25 537 45. Schein EH. The role of the founder in creating organizational culture. *Organ Dyn*  
26  
27 538 1983;12:13–28.  
28  
29  
30 539 46. Fixsen DL, Naoom SF, Blase KA, et al. Implementation Research: A Synthesis of the  
31  
32 540 Literature. Tampa, FL: University of South Florida; 2005.  
33  
34  
35 541 47. Linstone HA, Turoff M. The Delphi Method. 2002. Available from:  
36  
37 542 <https://pdfs.semanticscholar.org/8634/72a67f5bdc67e4782306efd883fca23e3a3d.pdf>  
38  
39 543 (accessed 1 September 2017).  
40  
41  
42 544 48. Rogers E. Diffusion of innovations. Free Press ; Collier Macmillan 1083. New York; London.  
43  
44 545 49. Michie S, Abraham C, Parker D et al. Making psychological theory useful for implementing  
45  
46 546 evidence based practice: a consensus approach. *Quality and Safety in Health* 2005; 1:26-33  
47  
48  
49 547 50. Cane J, O'Connor D, Michie S. Validation of the theoretical domains framework for use in  
50  
51 548 behaviour change and implementation research. *Implement Sci.* 2012; 7:37.  
52  
53  
54  
55  
56  
57  
58  
59  
60

1  
2  
3  
4 549 51. The Nuremberg Code. Trials of War Criminals Before the Nuernberg Military Tribunals  
5  
6 550 Under Control Council Law No. 10. 1949:181–182.  
7

8  
9 551  
10 552  
11  
12  
13  
14  
15  
16  
17  
18  
19  
20  
21  
22  
23  
24  
25  
26  
27  
28  
29  
30  
31  
32  
33  
34  
35  
36  
37  
38  
39  
40  
41  
42  
43  
44  
45  
46  
47  
48  
49  
50  
51  
52  
53  
54  
55  
56  
57  
58  
59  
60

For peer review only

553 **Figure 1.** WALK-Cph intervention and implementation activities (contents covered by the present  
 554 protocol are in red).

|                                                           | <b>Phase 1:<br/>Design</b>                                                                                                                                                                                                                                                                                                                                       |                                                                                                                                                                                                     | <b>Phase 2:<br/>Fidelity</b>                                                  |                                                                                                                                                                                   | <b>Phase 3:<br/>Intervention</b>                                                                                                                                         | <b>Phase 4:<br/>Adoption</b>                                                                               |
|-----------------------------------------------------------|------------------------------------------------------------------------------------------------------------------------------------------------------------------------------------------------------------------------------------------------------------------------------------------------------------------------------------------------------------------|-----------------------------------------------------------------------------------------------------------------------------------------------------------------------------------------------------|-------------------------------------------------------------------------------|-----------------------------------------------------------------------------------------------------------------------------------------------------------------------------------|--------------------------------------------------------------------------------------------------------------------------------------------------------------------------|------------------------------------------------------------------------------------------------------------|
| <b>WALK-Cph intervention</b><br>grant number [00013449]   | <b>Collaborative design of intervention (Study 1a)</b>                                                                                                                                                                                                                                                                                                           |                                                                                                                                                                                                     | <b>Fidelity of intervention (Study 2a)</b>                                    | <b>Redesign of intervention (Study 2c)</b>                                                                                                                                        | <b>Effect of intervention (Study 3a)</b>                                                                                                                                 |                                                                                                            |
|                                                           | <b>Practice observation study:</b><br>Observations of everyday practice to understand the context<br><br><b>Intervention design study:</b><br>Workshops I+I+III with users and researchers to design the intervention<br><br><b>Intervention determinant study:</b><br>Focus group interviews to identify barriers and facilitators for the planned intervention |                                                                                                                                                                                                     | Observational study to measure the fidelity of the intervention               | Workshop IV with users and researchers for further development and refinement of the intervention                                                                                 | <b>Randomized Controlled Trial:</b><br>To measure the effect of the invention<br><br><b>Fidelity of intervention:</b><br>Observations to assess delivery of intervention |                                                                                                            |
| <b>WALK-Cph implementation</b><br>grant number [00017276] |                                                                                                                                                                                                                                                                                                                                                                  | <b>Design and development of the implementation strategy to support the intervention (Study 1b)</b>                                                                                                 | <b>Fidelity of the implementation strategies (Study 2b)</b>                   | <b>Redesign of the implementation strategies (Study 2d)</b>                                                                                                                       | <b>Fidelity of the implementation strategies (Study 3b)</b>                                                                                                              | <b>Adoption study (Study 4)</b>                                                                            |
|                                                           |                                                                                                                                                                                                                                                                                                                                                                  | <b>Implementation strategy design study:</b><br><br>Workshop with users (managers and key implementation staff) and researchers to identify, select and monitor relevant implementation strategies. | Observational study to measure the fidelity of the implementation strategies. | Workshop with users (managers and key implementation staff) and researchers to redesign and monitor relevant implementation strategies based on the fidelity study and workshops. | (in case of redesign following 2d)<br><br>Observational study to measure fidelity                                                                                        | Observations of everyday practice and comparison with initial observations and semi-structured interviews. |

1  
2  
3  
4  
5  
6  
7  
8  
9  
10  
11  
12  
13  
14  
15  
16  
17  
18  
19  
20  
21  
22  
23  
24  
25  
26  
27  
28  
29  
30  
31  
32  
33  
34  
35  
36  
37  
38  
39  
40  
41  
42  
43  
44  
45  
46  
47  
48  
49  
50  
51  
52  
53  
54  
55  
56  
57  
58  
59  
60

555  
556

For peer review only

# BMJ Open

## A TAILORED STRATEGY FOR DESIGNING THE WALK-Copenhagen (WALK-Cph) INTERVENTION TO INCREASE MOBILITY IN HOSPITALIZED OLDER MEDICAL PATIENTS: A PROTOCOL FOR THE QUALITATIVE PART OF THE WALK-Cph PROJECT.

|                                 |                                                                                                                                                                                                                                                                                                                                                                                                                                                                                                                                                                                                                                                                                                                                                                                                                                                                                                                                                                                                                                                                                                                                                                                                                                                                                                                                                                                                                                                                                                                                                                                                                                                                      |
|---------------------------------|----------------------------------------------------------------------------------------------------------------------------------------------------------------------------------------------------------------------------------------------------------------------------------------------------------------------------------------------------------------------------------------------------------------------------------------------------------------------------------------------------------------------------------------------------------------------------------------------------------------------------------------------------------------------------------------------------------------------------------------------------------------------------------------------------------------------------------------------------------------------------------------------------------------------------------------------------------------------------------------------------------------------------------------------------------------------------------------------------------------------------------------------------------------------------------------------------------------------------------------------------------------------------------------------------------------------------------------------------------------------------------------------------------------------------------------------------------------------------------------------------------------------------------------------------------------------------------------------------------------------------------------------------------------------|
| Journal:                        | <i>BMJ Open</i>                                                                                                                                                                                                                                                                                                                                                                                                                                                                                                                                                                                                                                                                                                                                                                                                                                                                                                                                                                                                                                                                                                                                                                                                                                                                                                                                                                                                                                                                                                                                                                                                                                                      |
| Manuscript ID                   | bmjopen-2017-020272.R1                                                                                                                                                                                                                                                                                                                                                                                                                                                                                                                                                                                                                                                                                                                                                                                                                                                                                                                                                                                                                                                                                                                                                                                                                                                                                                                                                                                                                                                                                                                                                                                                                                               |
| Article Type:                   | Protocol                                                                                                                                                                                                                                                                                                                                                                                                                                                                                                                                                                                                                                                                                                                                                                                                                                                                                                                                                                                                                                                                                                                                                                                                                                                                                                                                                                                                                                                                                                                                                                                                                                                             |
| Date Submitted by the Author:   | 24-Dec-2017                                                                                                                                                                                                                                                                                                                                                                                                                                                                                                                                                                                                                                                                                                                                                                                                                                                                                                                                                                                                                                                                                                                                                                                                                                                                                                                                                                                                                                                                                                                                                                                                                                                          |
| Complete List of Authors:       | <p>Kirk, Jeanette; Copenhagen University Hospital Hvidovre, Hvidovre, Denmark , Clinical Research Centre</p> <p>Bodilsen, Ann Christine ; Copenhagen University Hospital Hvidovre, Hvidovre, Denmark , Clinical Research Centre; Exercise and Health, Roskilde Municipality, Roskilde, Denmark</p> <p>Tjørnhøj-Thomsen, Tine ; National Institute of Public Health, University of Southern Denmark</p> <p>Pedersen, Mette Merete; Copenhagen University Hospital Hvidovre, Hvidovre, Denmark , Clinical Research Centre; Physical Medicine &amp; Rehabilitation Research-Copenhagen, Copenhagen University Hospital Hvidovre,</p> <p>Bandholm, Thomas; Copenhagen University Hospital Hvidovre, Hvidovre, Denmark , Clinical Research Centre; Physical Medicine &amp; Rehabilitation Research-Copenhagen, Copenhagen University Hospital Hvidovre, Hvidovre, Denmark</p> <p>Husted, Rasmus; Copenhagen University Hospital Hvidovre, Hvidovre, Denmark , Clinical Research Centre; Physical Medicine &amp; Rehabilitation Research-Copenhagen, Copenhagen University Hospital Hvidovre</p> <p>Poulsen, Lise; Copenhagen University Hospital Hvidovre, Hvidovre, Denmark , Clinical Research Centre</p> <p>Petersen, Janne; Copenhagen University Hospital Hvidovre, Hvidovre, Denmark , Clinical Research Centre; Section of Biostatistics, Department of Public Health, University of Copenhagen, Copenhagen, Denmark</p> <p>Andersen, Ove; Copenhagen University Hospital, Hvidovre, Denmark, Clinical Research Centre</p> <p>Nilsen, Per ; Division of Community Medicine, Department of Medical and Health Sciences, Linköping University, Linköping, Sweden</p> |
| <b>Primary Subject Heading</b>: | Qualitative research                                                                                                                                                                                                                                                                                                                                                                                                                                                                                                                                                                                                                                                                                                                                                                                                                                                                                                                                                                                                                                                                                                                                                                                                                                                                                                                                                                                                                                                                                                                                                                                                                                                 |
| Secondary Subject Heading:      | Evidence based practice, Qualitative research                                                                                                                                                                                                                                                                                                                                                                                                                                                                                                                                                                                                                                                                                                                                                                                                                                                                                                                                                                                                                                                                                                                                                                                                                                                                                                                                                                                                                                                                                                                                                                                                                        |
| Keywords:                       | Elderly medical patients, critical realism, implementation, study protocol                                                                                                                                                                                                                                                                                                                                                                                                                                                                                                                                                                                                                                                                                                                                                                                                                                                                                                                                                                                                                                                                                                                                                                                                                                                                                                                                                                                                                                                                                                                                                                                           |
|                                 |                                                                                                                                                                                                                                                                                                                                                                                                                                                                                                                                                                                                                                                                                                                                                                                                                                                                                                                                                                                                                                                                                                                                                                                                                                                                                                                                                                                                                                                                                                                                                                                                                                                                      |

1  
2  
3  
4  
5  
6  
7  
8  
9  
10  
11  
12  
13  
14  
15  
16  
17  
18  
19  
20  
21  
22  
23  
24  
25  
26  
27  
28  
29  
30  
31  
32  
33  
34  
35  
36  
37  
38  
39  
40  
41  
42  
43  
44  
45  
46  
47  
48  
49  
50  
51  
52  
53  
54  
55  
56  
57  
58  
59  
60

SCHOLARONE™  
Manuscripts

For peer review only



# A TAILORED STRATEGY FOR DESIGNING THE WALK-Copenhagen (WALK-Cph) INTERVENTION TO INCREASE MOBILITY IN HOSPITALIZED OLDER MEDICAL PATIENTS: A PROTOCOL FOR THE QUALITATIVE PART OF THE WALK-Cph PROJECT.

Jeanette Wassar Kirk, PhD, Optimed, Clinical Research Centre, Copenhagen University Hospital Hvidovre, Kettegaard Allé 30, 2650 Hvidovre, Denmark. E-mail: jeanette.wassar.kirk@regionh.dk. Tlf.nr.: +45 38626195

1. Ann Christine Bodilsen, PhD, Optimed, Clinical Research Centre, Copenhagen University Hospital Hvidovre, Kettegaard Allé 30, 2650 Hvidovre, Denmark and. Exercise and Health, Rådhusbuen 1, 4000 Roskilde, Denmark.
2. Tine Tjørnhøj-Thomsen, MA, PhD, Professor, National Institute of Public Health, University of Southern Denmark, Copenhagen, Denmark.
3. Mette Merete Pedersen, PhD, Optimed, Clinical Research Centre, and Physical Medicine & Rehabilitation Research-Copenhagen (PMR-C), and Department of Physical and Occupational Therapy, Copenhagen University Hospital Hvidovre, Hvidovre, Denmark.
4. Thomas Bandholm, PhD, Professor, Optimed, Clinical Research Centre, and Physical Medicine & Rehabilitation Research-Copenhagen (PMR-C), and Department of Physical and Occupational Therapy, and Department of Orthopedic Surgery, Copenhagen University Hospital Hvidovre, Hvidovre, Denmark.
5. Rasmus Skov Husted, PhD student, Optimed, Clinical Research Centre, and Physical Medicine & Rehabilitation Research-Copenhagen (PMR-C), and Department of Physical and Occupational Therapy, Copenhagen University Hospital Hvidovre, Hvidovre, Denmark.
6. Lise Kronborg, PhD, Optimed, Clinical Research Centre, Copenhagen University Hospital Hvidovre, Hvidovre, Denmark.
7. Janne Petersen, PhD, Optimed, Clinical Research Centre, Copenhagen University Hospital Hvidovre, Hvidovre, Denmark and Section of Biostatistics, Department of Public Health, University of Copenhagen, Copenhagen, Denmark.
8. Ove Andersen, Professor, Clinical Research Centre, Copenhagen University Hospital Hvidovre, Hvidovre, Denmark.
9. Per Nilsen, Professor, Division of Community Medicine, Department of Medical and Health Sciences, Linköping University, Linköping, Sweden.

**Key words:** Study protocol, elderly medical patient, mobility, qualitative methods, critical realisme

## ABSTRACT

### Introduction

Older medical patients (>65 years) represent 54% of the admissions to Danish medical- and emergency departments (EDs). Acute admissions and bed rest during hospitalization are independent risk factors for death and dependency in older patients. Even short hospitalizations are associated with increased dependency in activities of daily living after discharge. Interventions that increase mobility during hospitalization are therefore important. The purpose of this protocol is to describe the intervention design of the WALK-Copenhagen project, aimed at increasing 24-hour mobility in older medical patients during acute hospitalizations and following discharge.

## Methods and analysis

This study is based on ethnographic fieldwork and interviews. Workshops are used to develop and co-design the intervention in collaboration with key stakeholders (patients, relatives, health professionals and researchers). Cultural learning processes, the theory of common knowledge and the cultural historical activity theory will be used to help us understand the interaction between the health professionals, structures and artefacts, in relation to mobility in the medical departments.

## Ethics and dissemination

The project will adhere to the directives of the Helsinki Declaration. Ethical approval was not required for the study since formal ethical approval is not mandatory for studies that do not involve biomedical issues according to Danish law. Informed consent was obtained for all participants. The results will be disseminated to health professionals, managers, patients and relatives, who will be invited to afternoon meetings where the project will be discussed. The results will be published in peer-reviewed scientific journals and presented at scientific conferences.

Word count; 249

## STRENGTHS AND LIMITATION

- The external validity, i.e. generalizability of study findings, may be compromised since the results cannot be directly transferred to hospital settings elsewhere
- A strength of the study is the use of multidisciplinary teams, as it provides different perspectives on the multidimensional issue under study
- A strength of the study is the use of theoretical frameworks as it enhances the ability to understand and explain how and why certain results are achieved.

## INTRODUCTION

It has been known for a long time that complete bed rest and low mobility in hospitalized patients can have serious health consequences (1). Nonetheless, and for a number of different reasons, today's hospitalized patients are very immobile (2). In older medical patients (aged 65 years or more), acute admissions and bed rest during hospitalization are independent risk factors for death and dependency (3,4) and even short hospitalizations are associated with increased dependency in activities of daily living after discharge (5). Hence, interventions to increase mobility in older patients during hospitalization are greatly needed to avoid serious health consequences after hospitalization, such as increased dependency.

Older people admitted acutely to hospital for medical reasons represent 54% of the annual admissions to Danish Medical- and Emergency Departments (EDs) (6). These older medical patients demonstrate a very low level of mobility during hospitalization (7,8). We recently reported the degree of low mobility in these patients to amount to a median of 17 hours a day in bed and less than one hour of walking a day during hospitalization (7). To make these numbers even more alarming is the fact that all patients walked independently (with or without walking aids) at admission (7). This low level of mobility during hospitalization in older medical patients poses a high risk of self-reported functional decline (9,10). Patients, who lose functional capacity during hospitalization have reduced ability to recover the lost function (4,9). Accordingly, many older medical patients will experience sustained functional limitations after hospitalization, placing them at increased risk of further functional decline, which can lead to dependency in activities of daily

1  
2  
3  
4 living institutionalization and death (10,11). Interventions that improve mobility during  
5 hospitalization are therefore important.  
6

7 Despite great knowledge of the importance of increased mobility to counteract functional decline in  
8 older medical patients, it has proven to be difficult to achieve (2). The reported difficulties include:  
9 lack of space and staff, medical equipment restricting out of the bed mobility, lack of assistive  
10 devices and help from staff, lack of patient motivation, patient weakness and pain and different  
11 views on the health professionals' roles concerning the task of mobilizing patients (2,12,13).  
12

13 Physiotherapists who work with older medical patients consider mobility to be a core task (13).  
14 However, the complexity of physiotherapy practice has increased due to changes in health care, e.g.  
15 a high patient turnover which places higher demands on physiotherapists to ensure effective  
16 management of patients (14). Thus, time and temporality become determinants to continuously  
17 support mobility of older medical patients during hospitalization. Hence, patient mobility is  
18 supported by nurses, who hold a key position in supporting mobility in older patients. However,  
19 nurses do not consider mobility as a part of their core tasks (15). Numerous determinants to nurses  
20 and physicians' efforts to improve mobility in patients have been identified (2). These include  
21 concerns about mobility related falls and doubts regarding the patients' motivation for mobility  
22 during acute illness. Thus, nurses and physicians do not encourage older medical patients to be  
23 mobilized (2). Based on different professional perspectives and priorities, there seems to be a  
24 paradox regarding older medical patients' mobility: physiotherapists perceive mobility as an  
25 important task to prevent functional decline, but nurses and other health professionals, who spend  
26 the most time with patients, do not consider patient mobility a core task and tend to focus on  
27 medical procedures and patient flow (16,17). Hence, patient mobility is dependent on several  
28 factors such as the efforts and beliefs of more than one group of health professionals and also on  
29 complex factors such as patients' knowledge, motivations and attitudes.  
30  
31  
32  
33  
34

35 To consider the determinants of mobility reviewed above – and to facilitate intervention uptake and  
36 clinical implementation – there is a need for developing an intervention that takes the multiple  
37 determinants of older patients' mobility into account. An intervention that is developed from a user  
38 perspective and is adapted to the local context is more likely to be successful (18). A growing body  
39 of evidence shows that patient engagement can yield better health outcomes (19), contribute to  
40 improvements in health care quality and patient safety (20) and lead to research findings that are  
41 more pertinent to the users' concerns and dilemmas (18). Nevertheless, user engagement is not  
42 common at the design phase of interventions. Instead, an intervention is typically designed on the  
43 basis of the literature, only rarely incorporating knowledge, skills and experiences from, for  
44 example, health professionals (21). The WALK-Cph intervention will be developed in collaboration  
45 between patients, relatives, researchers and health professionals. This collaboration makes it  
46 possible to use different experiences, skills, knowledge and expertise in the study while recognizing  
47 that the participants' local knowledge improves the external validity of the intervention. We  
48 therefore believe that the WALK-Cph study can make valuable methodological contributions to  
49 intervention research.  
50  
51  
52  
53  
54  
55  
56  
57  
58  
59  
60

1  
2  
3  
4 Thus, the aim of this protocol paper is to describe the intervention design of WALK-Cph, which is a  
5 mixed-methods clinical project aimed at developing and implementing an intervention to increase  
6 mobility in older medical patients during acute hospitalizations and following discharge. The  
7 qualitative part of the study started in January 2017 and will end by 1<sup>st</sup> of August 2018. The  
8 intervention design is based on a series of qualitative studies that are outlined below (Figure 1).  
9

## 10 11 **METHODS AND ANALYSES**

### 12 13 **Philosophy of science**

14  
15  
16 WALK-Cph is inspired by a critical realistic approach that focuses on the search for generative  
17 mechanisms that explain the social world. Realism as a philosophy of science is situated between  
18 the extremes of positivism and relativism (22) and acknowledges that the world is an open system  
19 with structures and layers that interact to form mechanisms and contexts. Thus, we are interested in:  
20 1) identifying, analyzing and understanding the social world of the health professionals regarding  
21 mobilization of older medical patients and 2) the health professionals' responses to different  
22 resources offered within new interventions. The focus is on understanding how the interaction  
23 between visible and non-visible features forms the health practitioners' actions, reactions and way  
24 of thinking, both individually and collectively. (23).  
25  
26  
27

28 In a critical realistic view, the world, i.e. in this study the medical departments, is divided into three  
29 domains: 1) the empirical domain (events and phenomena that can be perceived objectively); 2) the  
30 actual domain (events and phenomena that take place regardless of whether they can be perceived  
31 or not, but which are affecting the empirical domain); and 3) the real domain (structures and  
32 generative mechanisms, e.g. power, political decisions, and relationships). Thus, reality is layered  
33 like an iceberg extending beneath the surface where it is not visible to the eye. In a critical realistic  
34 approach, science is about exploring the third domain, the real domain. It is about going from  
35 experiencing a phenomenon and what is immediately perceived, to understanding and explaining  
36 which structures and mechanisms create the phenomenon (22).  
37  
38  
39

40 Adopting a critical realism position will allow us to focus on the interaction between actors and  
41 structures over time. A realistic methodology consists of different phases. The first phase will be to  
42 clarify what constitutes mobility of older medical patients. Secondly, empirical data on the  
43 phenomenon, i.e. mobility (movement sensor data and data from field study and barrier screening),  
44 will be collected. The third step will be to create new concepts, hypotheses, models or theories  
45 about mobility (abduction). This preliminary new knowledge will be presented in workshops for the  
46 health professionals and other researchers as a verification process. If the workshop participants can  
47 associate with the new concepts, models or hypotheses, a sound basis for the new knowledge to be  
48 used in practice has been created (24).  
49  
50  
51

### 52 53 **Mobility**

54 In WALK-Cph, mobility is defined in accordance with Satariano et al (2012, p.1508), who state that  
55  
56  
57

1  
2  
3  
4 mobility refers to “Movement in all of its forms, including basic ambulation, transferring from a  
5 bed to a chair, walking for leisure and the completion of daily tasks, engaging in activities  
6 associated with work and play, exercising, driving a car, and using various forms of public  
7 transport”(25). In addition, our definition of mobility includes mobilization, as many activities in  
8 and around patients in a medical department also relate to passive transferring. Therefore, in  
9 WALK-Cph mobility refers to situations where the individual is actively involved in movement and  
10 situations where the individual is passively moved, e.g. moved around in the bed.  
11  
12

### 13 **Study design**

14  
15  
16 WALK-Cph is a pragmatic cross-sectoral and mixed-methods project with the overall aim of  
17 increasing 24-hour mobility in older patients during acute hospitalization and following discharge.  
18 The primary outcome for the WALK-Cph study is increased mobility and will be estimated as steps,  
19 transitions, or upright time, based on thigh-worn accelerometry using activPAL3™ activity  
20 monitors (PAL Technologies Ltd., Glasgow, UK). Whether the primary outcome will be expressed  
21 as steps, transitions, or upright time depends on initial pilot and feasibility testing of the  
22 intervention, the outcomes and other trial procedures (study 2a and 2c, Figure 1) to help qualify the  
23 randomized controlled trial (study 3a, Figure 1) of the WALK-Cph project. The intervention is  
24 based on an assumption that by tailoring the intervention to the local context the likelihood of a  
25 successful implementation will increase (18,26). This will be done by developing and co-designing  
26 the intervention in collaboration with key stakeholders such as patients, relatives, health  
27 professionals and researchers, in accordance with the BMJ campaign “Partnering with patients”  
28 ([http://www.bmj.com/company/qip\\_examples/partnering-with-patients/](http://www.bmj.com/company/qip_examples/partnering-with-patients/)). A tailored intervention is  
29 defined as an intervention in which the identification of barriers has been undertaken before the  
30 design and delivery of the intervention (18).  
31  
32  
33  
34

35  
36 The design of the intervention was inspired by the Medical Research Council (MRC) framework for  
37 the development and evaluation of complex interventions to improve health (21). However, instead  
38 of first conducting an intervention study to ascertain clinical effectiveness and then, considering  
39 implementation, WALK-Cph is designed both as an intervention and an implementation study, a so-  
40 called Hybrid Design (27). This means that the implementation study is planned from the outset of  
41 the project. Hybrid Design has been advocated to improve the speed of generating new knowledge  
42 and to increase the benefit and uptake of clinical research (27).  
43  
44

45  
46 In four studies, we will design (Phase 1), fidelity-test (Phase 2), impact-test (Phase 3) and measure  
47 adoption (Phase 4) of the intervention (Figure 1). Following an initial observational study, the  
48 health professionals from two intervention departments will be asked to participate in workshops  
49 and focus group interviews during the full study period (Figure 1).  
50

51  
52 In order to achieve the overall project aim, the following research questions will be addressed in the  
53 qualitative studies of WALK-Cph:  
54  
55  
56  
57

- 1
- 2
- 3
- 4 1. Which cultural practices exist for mobility of older medical patients in the medical departments?
- 5
- 6 2. What are the roles of different professional cultures both regarding mobility of older patients and
- 7 regarding collaboration between different professional groups to achieve increased mobility in older
- 8 patients during and after hospitalization?
- 9
- 10
- 11 3. How can we develop a patient intervention that is tailored to local cultural practices and based on
- 12 a high degree of user-engagement by health professionals, patients and their relatives?
- 13
- 14
- 15 4. How does a tailored patient intervention influence the extent to which health professionals and
- 16 patients adhere to recommendations for managing increased mobility in older patients during and
- 17 after hospitalization?
- 18
- 19

### 20 **Study setting**

21 WALK-Cph will be carried out in Denmark where the health care system is publicly funded by the  
22 tax payers. The Danish welfare state provides free treatment for primary medical care, hospitals,  
23 and home-based care services for all citizens. WALK-Cph will be conducted at six medical  
24 departments in three public hospitals in the Capital region of Copenhagen, Denmark. In addition,  
25 physiotherapy departments, a municipality and a municipality-based rehabilitation center will  
26 participate.

27 WALK-Cph will use a purposeful sampling approach (28) to reflect the diversity in medical  
28 specialties and to obtain rich information concerning the mobility practice in medical patients. We  
29 will select departments that reflect many facets of the medical specialty rather than focusing on one  
30 specialty. Based on this, we will include medical departments where older medical patients are  
31 admitted and where increased mobility is expected to be one of the core tasks of care and treatment.  
32 Six different departments will be chosen to participate: 1) a department of endocrinology; 2) a  
33 department of infectious diseases; 3) a department of pulmonary diseases; 4) a department of  
34 gastroenterology; 5) a general medical department; and 6) an emergency department. Each chosen  
35 department will have between 18-40 beds with similar numbers and proportions of physicians,  
36 registered nurses and certified nursing assistants. In all hospitals, the physiotherapy service is  
37 centrally organized to service all wards.

### 45 **Qualitative methods**

46 The qualitative methods will include an ethnographic field study (comprising participant  
47 observation and interviews) and workshops to provide in-depth relational knowledge for designing  
48 an appropriate patient intervention (20) and for obtaining knowledge about the contextual  
49 circumstances with regard to the implementation, delivery and evaluation of the intervention. These  
50 methods, will enable us to account for the context in which events occur and uncover social  
51 patterns, for example which relationships are important for actions related to mobility and for  
52 interventions that increase mobility. Qualitative methods are also valuable in exploring the  
53  
54  
55  
56  
57

1  
2  
3  
4 underlying assumptions in relation to the designed intervention and in identifying the so-called  
5 active ingredients of a complex intervention (18) aimed at increasing mobility. Finally, the use of  
6 qualitative studies make it possible to determine which groups of participants are most likely to  
7 respond positively to the designed intervention, and whether the intervention must be modified in  
8 different ways for different groups or departments (20,21,29).  
9

### 10 11 **Ethnographic field study** 12

13 The design phase (Figure 1) will begin with an ethnographic field study including participant  
14 observation and interviews (29–31). Our position will primarily be observant rather than  
15 participating (32). The field study will enable us to generate rich descriptions of the interactions  
16 between health professionals and patients and explore the importance of contextual factors,  
17 professional identities and professional boundaries for mobility of older medical patients in the  
18 departments. This is crucial since observational knowledge relating to mobility of older medical  
19 patients in the departments is sparse. By being physically present in the departments, taking part in  
20 and observing the health professionals carrying out their daily activities, we will be able to  
21 understand how mobility of older patients is practiced in the departments and how it is perceived  
22 by different participants (29).  
23  
24  
25

26  
27 We have chosen a focused observation strategy (28,33), whereby we will follow the health  
28 professionals (physiotherapists, nurses, nursing assistants and physicians) in their daily work with a  
29 particular focus on language, actions and materialities regarding mobility of patients. We will  
30 inquire into what is being done and into arguments for decisions that the health professionals make  
31 about mobility in concrete situations. We expect to follow between 60 and 80 health professionals  
32 depending on staffing on the days of observation and depending on who is involved in mobility of a  
33 given patient.  
34  
35

36  
37 The observations will be carried out by the researchers, two of whom are trained nurses (Msn)  
38 while two are trained physiotherapists (MHSc). By choosing researchers with different professional  
39 backgrounds, we acknowledge that the ability to gather data and generate knowledge depends on  
40 the position of the researcher (32,34). However, we anticipate that by comparing our observations,  
41 we will become aware of our own positions and perspectives and how they frame our observations.  
42 Thus, by cross-checking and discussing our observations, we can sharpen our attention on  
43 differences of significance for data generation. This process will take place continuously during  
44 meetings after each observation period to cross-check data and interpretations and will strengthen  
45 the validity of the results (33). By systematizing the observations and creating transparency the  
46 observations will ascertain credibility (29,35) and enable exploring and understanding of how  
47 health professionals make decisions about mobility in interaction with the patients and each other.  
48  
49  
50

51  
52 We will use an observation guide to record activities and interactions (Appendix 1). Field notes will  
53 consist of observations of both non-verbal and verbal aspects such as body language, dialogue  
54  
55  
56  
57  
58  
59  
60

1  
2  
3  
4 between the health professionals and patients, and the use of material artefacts such as mobility  
5 aids. Dialogues will be written down as close to verbatim as possible (36).  
6

7 The observation guide will also include descriptive data (e.g. sex, profession and professional  
8 experience) and questions like “Who initiated mobility?”, “Which arguments are raised when  
9 patients’ needs for mobility are rejected or accepted?”, “Is any kind of material artefact used, such  
10 as a walker or a screening tool?” According to Mason (37) field notes should also include focus  
11 areas of “subjective capabilities”. The intention is that the researcher writes down reflections on his  
12 or her own actions, attitudes, location and presence. This increases the understanding of how the  
13 researchers affect the relations, underscoring that neutrality and detachment in relation to data  
14 collection, analysis and interpretation is impossible.  
15  
16  
17

### 18 **Analytical perspective**

19 We will analyze our observational data using different theories: cultural learning processes and  
20 cultural historical activity theory (34,38). These theories can help us understand barriers and  
21 transformations in the interaction between the health professionals, structures and artefacts. Also, it  
22 can help us understand how the culture creates ideas about how participants, for example the  
23 nurses, should interpret and act in relation to mobility in the department(34).  
24  
25  
26  
27

28 WALK-Cph derives its concept of culture from the theories of cultural learning processes that  
29 understand culture not only as a homogeneous set of assumptions, attitudes and values that all  
30 health professionals possess (36–38). Rather, culture is understood as something the health  
31 professionals produce in order to create links and connections between materialities and meanings  
32 in social and physical spaces (29,34). This means that culture does not refer to cognitive processes  
33 only (39–41), culture is also enacted and have bodily elements embedded. This concept of culture is  
34 relevant when we use observational studies, where we can observe how the health professionals act,  
35 what they say, what materialities they include and exclude in their professional practice and how  
36 they move in physical rooms. In this perspective, the concept of culture focuses both on what is  
37 homogeneous and what is different, for example between professions (23).  
38  
39  
40  
41

42 Data from the ethnographic field study will be analyzed using both a thematic analysis and a  
43 deductive approach where we will analyze the material from the perspective of different theoretical  
44 concepts, e.g. as cultural models (23), and activity systems (38).  
45  
46

47 The results from the analysis will be presented and used as mirror data in the subsequent workshop  
48 (Figure 1). Mirror data are defined as data representing the present state of work practices and these  
49 data provide the health professionals with a mirror reflection of their activities by presenting  
50 examples of current practice (42).  
51  
52

### 53 **The workshops**

54  
55  
56  
57  
58  
59  
60



1  
2  
3  
4 After the field study, four workshops of four hours will be used to develop the WALK-Cph  
5 intervention in collaboration with health professionals, patients, relatives and researchers. In the  
6 workshops, we will get an opportunity to bring together different forms of evidence-based  
7 knowledge, both theoretical and empirical, to accommodate increased mobility of older medical  
8 patients (38). Furthermore, the workshop method is chosen because implementation research points  
9 to the importance of involving the persons who are responsible for increasing mobility of older  
10 medical patients, in this case the health professionals (26). Each workshop will be held in a  
11 classroom in the hospital and will be video- and audiotaped. The design phase consists of three  
12 workshops, which are described below.  
13  
14

#### 15 16 Workshop I: Health professionals.

17 Health professionals from the intervention departments and the municipality will participate. The  
18 aim of this workshop is to develop a catalogue of initiatives that the health professionals believe  
19 will increase mobility of older medical patients. The catalogue will be based on the health  
20 professionals' knowledge, experience and attitudes as well as the observational data from the field  
21 study. The proposed initiatives will form the basis for the development of the intervention  
22 (Appendix 2).  
23  
24

#### 25 26 Workshop II: Patients and relatives.

27 Patients and their relatives will participate. Workshop II has two aims: First, to generate a catalogue  
28 of initiatives that the patients and the relatives believe will increase mobility, based on their  
29 knowledge, experience, attitudes and mirror-data. Second, to obtain feedback from the patients and  
30 their relatives on the catalogue of initiatives suggested by the health professionals at workshop I.  
31 The initiatives suggested by patients and relatives also contribute to the development of the  
32 intervention. The results from workshop II are weighted as much as the results from workshop I.  
33  
34

#### 35 36 Workshop III: Health professionals.

37 Health professionals will participate and be introduced to the patients' and the relatives' proposals.  
38 The particular aim of workshop III is to finalize a prototype of the intervention. Hereafter, a study  
39 focusing on facilitators and barriers (barrier screening) will be performed and the intervention will  
40 be adjusted according to the results of the barrier screening and afterwards be tested in a feasibility  
41 study (Study II, Figure 1).  
42  
43

44 Following the design phase, an additional workshop will be conducted.  
45

#### 46 47 Workshop IV: Health professionals, patients and relatives.

48 Health professionals, patients and relatives will participate to provide feedback on the proposed  
49 intervention. The aim of workshop IV will be to adapt and design the final intervention which will  
50 be tested in the fidelity study (Figure 1) and subsequently in the RCT study  
51 Between the different workshops, the research team will work systematically to develop the  
52 intervention based on the five-phase model for design of interventions: 1) problem analysis and  
53 project planning, 2) information gathering and synthesis, 3) design, 4) pilot testing and 5)  
54 evaluation (43). As a part of the workshops and the barrier screening, input from health  
55  
56  
57  
58  
59  
60

professionals, patients and relatives will be collected and the research team will score the feasibility of all incoming input based on a number of criteria: rationality, complexity, compliance with rules and regulation, required time, economical neutrality, accessibility of equipment and amelioration of patient life quality. Inspired by the Delphi method (44) all input will be scored between 1 and 5, where 1 represents low complexity and 5 represents high complexity. For example: if the intervention proposal is less complex, the score will be 1 to indicate low complexity. All interventions that have a median score equal to or below 2 will be included in the final intervention.

### **The participants**

The participants in workshops II and IV will be 8-10 older medical patients (+ 65 years) who have been admitted to a medical department and 8-10 relatives who have had a relative, friend or family member (+65 years) admitted to a medical department. Further, the participants in workshop I, III and IV will be physicians, nurses and nursing assistants, physiotherapists, occupational therapists and managers affiliated with the two intervention departments or the municipalities. The health professionals will be selected by their managers and will be selected both by profession, experience in the medical or physiotherapy department and for being responsible for the implementation of the intervention. The selection will range from enthusiastic people who are good at initiating and managing interventions, even beyond their own department, to those who have a strong voice within the department and finally, those with the greatest resistance towards the intervention (45). This complexity of participants ensures a multi-voiceness perspective (42) on both possibilities and barriers in relation to designing an intervention that has the ability to match the local context.

### **Barrier screening**

A barrier screening designed as semi-structured individual interviews with health professionals will be carried out in the two intervention departments, the physiotherapy departments and the municipalities after the intervention has been designed. The aim of the barrier screening is to explore and understand the health professionals' perceived barriers and facilitators regarding the intervention, once it has been designed (Figure 1). The barrier screening will complement the field studies at the organizational level and the workshops at the group level. To ensure that the intervention is based on opinions, attitudes and perspectives from health professionals with positions other than those who participate in the workshops, 20 interviews with health professionals will be conducted. Both contradictory and complementary views are relevant for identifying patterns in the participants' understanding, practices and how they relate to situations involving mobility of older medical patients.

The barrier screening will be designed and analyzed based on The Theoretical Domain Framework (TDF) (46,47) and Rogers' framework of innovation attributes (45). The purpose of the TDF is to identify determinants at an individual level. Rogers' innovation attributes concern a number of perceived characteristics of innovations, which influence their adoption and use. Interventions that do not meet these criteria tend to be difficult to disseminate and implement. WALK-Cph is premised on the assumption that an intervention that is developed with contributions from the

perspective of the users and is adapted to the local context is more likely to be implemented (48) .

## ETHICS AND DISSEMINATION

Before undertaking observations, interviews and workshops all participants will be informed about the aim of the study. They will be assured that participation is voluntary and that results will be anonymous. All participants will be asked to provide their written, voluntary and informed consent before participation in the workshops and interviews. Anonymity will be ascertained by assigning each participant with a code in the field notes and interviews. Only persons who are part of the research team will have access to data. The project will adhere to the directives of the Helsinki Declaration (49). Ethical approval was not required for the study since formal ethical approval is not mandatory for studies that do not involve biomedical issues (I-Suite no: 05078) according to Danish law.

After completing the study, the results will be disseminated to all the health professionals, managers, patients and relatives. They will be invited to afternoon meetings where the findings, the process and cooperation will be in focus. The results from the study will be published in peer-reviewed scientific journals and presented at one or more scientific conferences.

Word count; 4280 words

## REFERENCES

1. Dock W. The evil sequelae of complete bed rest. *J Am Med Assoc.* 1944;125(16):1083–1085.
2. Brown CJ, Williams BR, Woodby LL, Davis LL, Allman RM. Barriers to mobility during hospitalization from the perspectives of older patients and their nurses and physicians. *J Hosp Med.* 2007 Sep;2(5):305–13.
3. Zisberg A, Shadmi E, Sinoff G, Gur-Yaish N, Srulovici E, Admi H. Low Mobility During Hospitalization and Functional Decline in Older Adults: IN-HOSPITAL MOBILITY LEVELS AND FUNCTIONAL DECLINE. *J Am Geriatr Soc.* 2011 Feb;59(2):266–73.
4. Brown CJ, Friedkin RJ, Inouye SK. Prevalence and outcomes of low mobility in hospitalized older patients. *J Am Geriatr Soc.* 2004;52(8):1263–1270.
5. Henneman P, Fisher D, Henneman E, Pham T, Campbell M. Patient identification errors are common in a simulated setting. *Ann Emerg Med.* 2010;(55(6)):503–9.
6. Danmark, Sundhedsstyrelsen. Styrket indsats for den ældre medicinske patient: fagligt oplæg til en national handlingsplan. Sundhedsstyrelsen; 2011. Denmark, The Danish Health Authority. [Strengthened efforts for the older medical patient - a proposal for a national action plan]. In Danish. The Danish Health Authority, 2011.

- 1
- 2
- 3
- 4 7. Pedersen MM, Bodilsen AC, Petersen J, Beyer N, Andersen O, Smith L, et al. Acute Twenty-Four-Hour Mobility During Acute Hospitalization in Older Medical Patients. *J Am Geriatr Soc.* 2013;(March;68(3):331–337.).
- 5
- 6
- 7
- 8 8. Brown C, Roth D, Peel C, Allman R. Predictors of regaining ambulatory ability during hospitalization. *J Hosp Med.* 2006;1:277-284.
- 9
- 10
- 11 9. Boyd CM, Landefeld CS, Counsell SR, Palmer RM, Fortinsky RH, Kresevic D, et al. Recovery of Activities of Daily Living in Older Adults After Hospitalization for Acute Medical Illness: FUNCTIONAL RECOVERY AFTER HOSPITALIZATION. *J Am Geriatr Soc.* 2008 Dec;56(12):2171–9.
- 12
- 13
- 14
- 15
- 16 10. Boyd CM, Xue Q-L, Guralnik JM, Fried LP. Hospitalization and development of dependence in activities of daily living in a cohort of disabled older women: the Women’s Health and Aging Study I. *J Gerontol A Biol Sci Med Sci.* 2005;60(7):888–893.
- 17
- 18
- 19
- 20 11. Callen BL, Mahoney JE, Grieves CB, Wells TJ, Enloe M. Frequency of hallway ambulation by hospitalized older adults on medical units of an academic hospital. *Geriatr Nur (Lond).* 2004;25(4):212–217.
- 21
- 22
- 23
- 24 12. Doherty-King B, Yoon JY, Pecanac K, Brown R, Mahoney J. Frequency and Duration of Nursing Care Related to Older Patient Mobility: Nursing Care Related to Mobility. *J Nurs Scholarsh.* 2014 Jan;46(1):20–7.
- 25
- 26
- 27
- 28 13. Brown CJ, Flood KL. Mobility Limitation in the Older Patient: A Clinical Review. *JAMA.* 2013 Sep 18;310(11):1168.
- 29
- 30
- 31 14. Nilsen P, Bernhardsson S. Towards evidence-based physiotherapy – research challenges and needs. *J Physiother.* 2013 Sep;59(3):143–4.
- 32
- 33
- 34 15. Dishman RK, Sallis JF, Orenstein DR. The determinants of physical activity and exercise. *Public Health Rep.* 1985;100, 158–71.
- 35
- 36
- 37 16. Kirk W., Nilsen P. Implementing evidence-based practices in an emergency department: Contradictions exposed when prioritizing a flow culture. *J Clin Nurs Accept.* 2015;
- 38
- 39
- 40 17. Kirk JW, Nilsen P. Implementing evidence-based practices in an emergency department: contradictions exposed when prioritising a flow culture. *J Clin Nurs.* 2016 Feb;25(3–4):555–65.
- 41
- 42
- 43
- 44 18. Baker R, Camosso-Stefinovic J, Gillies C, Shaw EJ, Cheater F, Flottorp S, et al. Tailored interventions to overcome identified barriers to change: effects on professional practice and health care outcomes. In: The Cochrane Collaboration, editor. *Cochrane Database of Systematic Reviews* [Internet]. Chichester, UK: John Wiley & Sons, Ltd; 2010 [cited 2015 Sep 16]. Available from: <http://doi.wiley.com/10.1002/14651858.CD005470.pub2>
- 45
- 46
- 47
- 48
- 49
- 50 19. Carman KL, Dardess P, Maurer M, Sofaer S, Adams K, Bechtel C, et al. Patient And Family Engagement: A Framework For Understanding The Elements And Developing Interventions And Policies. *Health Aff (Millwood).* 2013 Feb 1;32(2):223–31.
- 51
- 52
- 53
- 54
- 55
- 56
- 57
- 58
- 59
- 60

- 1
- 2
- 3
- 4 20. Jansen YJFM, Foets MME, de Bont AA. The contribution of qualitative research to the
- 5 development of tailor-made community-based interventions in primary care: a review. *Eur J*
- 6 *Public Health*. 2010 Apr 1;20(2):220–6.
- 7
- 8 21. MRC. A framework for the development and evaluation of RCTs for complex interventions to
- 9 improve health. Rep No 200018 Lond Med Res Council. 2000;
- 10
- 11 22. Bhaskar R. *A Realist Theory of Science*. Hemel Hempstead. Herts: Harvester Wheatsheaf;
- 12 1975.
- 13
- 14 23. Hasse C. *An anthropology of learning: on nested frictions in cultural ecologies*. New York,
- 15 NY: Springer Berlin Heidelberg; 2014.
- 16
- 17 24. Archer MS, editor. *Critical realism: essential readings*. London ; New York: Routledge; 1998.
- 18 756 p. (Critical realism--interventions).
- 19
- 20 25. Satariano WA, Guralnik JM, Jackson RJ, Marottoli RA, Phelan EA, Prohaska TR. Mobility
- 21 and aging: new directions for public health action. *Am J Public Health*. 2012;102(8):1508–
- 22 1515.
- 23
- 24 26. Fixsen DL, Naoom SF, Blase KA, Friedman RM, Wallace F. *Implementation research: A*
- 25 *synthesis of the literature*. 2005 [cited 2014 Feb 1]; Available from:
- 26 [http://centerforchildwelfare2.fmhi.usf.edu/kb/Implementation/Implementation%20Research%](http://centerforchildwelfare2.fmhi.usf.edu/kb/Implementation/Implementation%20Research%20-%20A%20Synthesis%20of%20Literature%20-%202005.pdf)
- 27 [20-%20A%20Synthesis%20of%20Literature%20-%202005.pdf](http://centerforchildwelfare2.fmhi.usf.edu/kb/Implementation/Implementation%20Research%20-%20A%20Synthesis%20of%20Literature%20-%202005.pdf)
- 28
- 29
- 30 27. Curran GM, Bauer M, Mittman B, Pyne JM, Stetler C. Effectiveness-implementation Hybrid
- 31 Designs: Combining Elements of Clinical Effectiveness and Implementation Research to
- 32 Enhance Public Health Impact. *Med Care*. 2012 Mar;50(3):217–26.
- 33
- 34 28. Wolcott HF. Confession of a “trained” observer. In: *Transforming Qualitative Data.*
- 35 *Description, Analysis and Interpretation*. Thousands Oaks: Sage Publications; 1994.
- 36
- 37 29. Hastrup K, Rubow C, Tjørnhøj-Thomsen T. *Kulturanalyse. Kort fortalt*. Vol. 2011.
- 38 Frederiksberg C, København: Samfundslitteratur; 2011.
- 39
- 40 30. Hastrup K. *Ind i verden: en grundbog i antropologisk metode*. Kbh.: Hans Reitzel; 2003.
- 41
- 42 31. Spradley JP. *The Ethnographic Interview*. Holt, Rinehart & Winston, London [Internet]. 1979
- 43 [cited 2013 Oct 21]. Available from:
- 44 [http://www.statsbiblioteket.dk/au/index.jsp?query=Spradley+J.P.+%281979%29+The+Ethnog](http://www.statsbiblioteket.dk/au/index.jsp?query=Spradley+J.P.+%281979%29+The+Ethnographic+Interview.+Holt%2C+Rinehart+%26+Winston%2C+London&first_search=true&keepFilter=false&delimiterType=available)
- 45 [raphic+Interview.+Holt%2C+Rinehart+%26+Winston%2C+London&first\\_search=true&keep](http://www.statsbiblioteket.dk/au/index.jsp?query=Spradley+J.P.+%281979%29+The+Ethnographic+Interview.+Holt%2C+Rinehart+%26+Winston%2C+London&first_search=true&keepFilter=false&delimiterType=available)
- 46 [Filter=false&delimiterType=available](http://www.statsbiblioteket.dk/au/index.jsp?query=Spradley+J.P.+%281979%29+The+Ethnographic+Interview.+Holt%2C+Rinehart+%26+Winston%2C+London&first_search=true&keepFilter=false&delimiterType=available)
- 47
- 48
- 49 32. Spradley JP. *Participant observation*. Waveland, Press. Inc.; 1980.
- 50
- 51 33. Tjørnhøj-Thomsen T, Reynolds Whyte S. Fieldwork and participant observation. In: *Research*
- 52 *methods in public health*. Gyldendal Akademisk. In Gyldendal Akademisk; 2008.
- 53
- 54 34. Hasse C. *Kulturanalyse i organisationer. Begreber, metoder og forbløffende læreprocesser*
- 55 [Internet]. 1. udgave. Vol. 2011. Frederiksberg : Samfundslitteratur, 2011; 2011 [cited 2013 Oct
- 56
- 57
- 58
- 59
- 60

- 21]. Available from:  
[http://www.statsbiblioteket.dk/au/index.jsp?query=Kulturanalyse+I+organisationer.+Begreber+%2C+metoder+og+forbl%C3%B8ffende+I%C3%A6reprocesser&first\\_search=true&keepFilter=false&delimitType=#/?recordId=sb\\_5228224](http://www.statsbiblioteket.dk/au/index.jsp?query=Kulturanalyse+I+organisationer.+Begreber+%2C+metoder+og+forbl%C3%B8ffende+I%C3%A6reprocesser&first_search=true&keepFilter=false&delimitType=#/?recordId=sb_5228224)
35. Hastrup K. Getting it right: Knowledge and evidence in anthropology. *Anthropol Theory*. 2004 Dec 1;4(4):455–72.
  36. Berg BL. *Qualitative Research Methods for the Social Sciences (3rd Edition)*. Boston: MA:Allyn and Bacon; 1998.
  37. Mason J. *Qualitative Researching*. London: Sage; 1996.
  38. Engeström Y. *Learning-by-Expanding. An Activity-Theoretical Approach To Developmental Research*. Helsinki: Orienta-Konsultit.; 1987.
  39. Weick KE. Organizational culture as a source of high reliability [Internet]. National Emergency Training Center; 1987 [cited 2015 Dec 17]. Available from: [http://www.aml-safety.com.au/AMLstores/\\_images/pdf-files/Weick1987.pdf](http://www.aml-safety.com.au/AMLstores/_images/pdf-files/Weick1987.pdf)
  40. Schein EH. *Process consultation: its role in organization development*. Reading, Mass.: Addison-Wesley; 1969.
  41. Schein EH. The Role of the Founder in Creating Organizational Culture. *Organizational Dynamics*; 1983. 13-28 p.
  42. Kerosuo H, Engeström Y, Kajamaa A. Promoting innovation and learning through Change Laboratory: An example from Finnish health care. *Cent Eur J Public Policy*. 2010;(1):110–131.
  43. Rothman J, Edwin J T. *Intervention research: design and development for human services*. New York: Haworth Pres; 1994.
  44. Linstone HA, Turoff M. The Delphi Method. *Tech Appl [Internet]*. 2002 [cited 2017 Sep 1];53. Available from: <https://pdfs.semanticscholar.org/8634/72a67f5bdc67e4782306efd883fca23e3a3d.pdf>
  45. Rogers EM. *Diffusion of innovations*. New York; London: Free Press ; Collier Macmillan; 1983.
  46. Michie S. Making psychological theory useful for implementing evidence based practice: a consensus approach. *Qual Saf Health Care*. 2005 Feb 1;14(1):26–33.
  47. Cane J, O'Connor D, Michie S, others. Validation of the theoretical domains framework for use in behaviour change and implementation research. *Implement Sci*. 2012;7(1):37.
  48. McCusker. McCusker et al. 1999, *JAGS* 47 (10) 1229-37). 1999;
  49. Code N. The Nuremberg Code. *Trials War Crim Nuremberg Mil Trib Control Counc Law*. 1949;(10):181–182.

1  
2  
3  
4  
5  
6 Word count; 1173 words

7  
8 **Acknowledgements:** We thank the management staff from the medical departments, the  
9 physiotherapy and occupational therapy departments and the municipalities for their commitment to  
10 participate in the study and for giving us the opportunity to conduct field studies in their  
11 departments.  
12

13 **Contributors:** JWK led the study and drafted the manuscript in collaboration with CB, TTT, PN,  
14 and MMP. TB, RH, OA, JP, LK extensively revised the manuscript. All authors have approved the  
15 final manuscript and are willing to take responsibility for appropriate portions of the content.  
16

17  
18 **Funding:** This work was funded by the Velux Foudation (Lauritz William Foundation) grant  
19 number [00013449]  
20

21 **Competing interests:** None.  
22  
23  
24

25 Figure 1. WALK-Cph intervention and implementation activities (contents covered by the present  
26 protocol are in red).  
27  
28  
29  
30  
31  
32  
33  
34  
35  
36  
37  
38  
39  
40  
41  
42  
43  
44  
45  
46  
47  
48  
49  
50  
51  
52  
53  
54  
55  
56  
57  
58  
59  
60

Figure 1: WALK-Cph intervention and implementation activities (Contents covered by the present protocol are written in red).

|                                                  | Phase 1:<br>Design                                                                                                                                                                                                                                                                                                                                                                                                           |                                                                                                                                                                                                                                                                                                           | Phase 2:<br>Fidelity                                                                                                                 |                                                                                                                                                                                                                                                   | Phase 3:<br>Intervention                                                                                                                                                                                      | Phase 4:<br>Adoption                                                                                                                              |
|--------------------------------------------------|------------------------------------------------------------------------------------------------------------------------------------------------------------------------------------------------------------------------------------------------------------------------------------------------------------------------------------------------------------------------------------------------------------------------------|-----------------------------------------------------------------------------------------------------------------------------------------------------------------------------------------------------------------------------------------------------------------------------------------------------------|--------------------------------------------------------------------------------------------------------------------------------------|---------------------------------------------------------------------------------------------------------------------------------------------------------------------------------------------------------------------------------------------------|---------------------------------------------------------------------------------------------------------------------------------------------------------------------------------------------------------------|---------------------------------------------------------------------------------------------------------------------------------------------------|
| WALK-Cph intervention<br>grant number [00013449] | <b>Collaborative design of intervention (Study 1a)</b><br><br><b>Practice observation study:</b><br>Observations of everyday practice to understand the context<br><br><b>Intervention design study:</b><br>Workshops I-III with users and researchers to design the intervention<br><br><b>Intervention determinant study:</b><br>Focus group interviews to identify barriers and facilitators for the planned intervention |                                                                                                                                                                                                                                                                                                           | <b>Fidelity of intervention (Study 2a)</b><br><br>Observational study to measure fidelity of the intervention                        | <b>Redesign of intervention (Study 2c)</b><br><br>Workshop IV with users and researchers for further development and refinement of the intervention                                                                                               | <b>Effect of intervention (Study 3a)</b><br><br>Randomized Controlled Trial:<br>To measure effect of the invention<br><br><b>Fidelity of intervention:</b><br>Observations to assess delivery of intervention |                                                                                                                                                   |
|                                                  | WALK-Cph implementation<br>grant number [00017276]                                                                                                                                                                                                                                                                                                                                                                           | <b>Design and development of implementation strategy to support the intervention (Study 1b)</b><br><br><b>Implementation strategy design study:</b><br><br>Workshop with users (managers and key implementation staff) and researchers to identify select and monitor relevant implementation strategies. | <b>Fidelity of implementation strategies (Study 2b)</b><br><br>Observational study to measure fidelity of implementation strategies. | <b>Redesign of implementation strategies (Study 2d)</b><br><br>Workshop with users (managers and key implementation staff) and researchers to re-design and monitor relevant implementation strategies based on the fidelity study and workshops. | <b>Fidelity of implementation strategies (Study 3b)</b><br><br>(in case of redesign following 2d)<br><br>Observational study to measure fidelity                                                              | <b>Adoption study (Study 4)</b><br><br>Observations of everyday practice and comparison with initial observations and semi-structured interviews. |

254x179mm (96 x 96 DPI)







## **Appendix 2: QUESTIONS FOR WORKSHOP I – HEALTH PROFESSIONALS IN THE HOSPITAL**

1. What do you think of what you have heard - both regarding the preliminary analyzes of accelerometer data and the preliminary data from the observations? What had made the biggest impression on you? And why? (about 10 minutes).

Data from the observation study show that nurses and doctors do not perceive mobilization as part of the treatment for. Therapists' perceived mobilization / physical activities as part of the treatment, but prioritized respiratory physiotherapy and rehabilitation plans over mobilization (about 10 minutes).

2. What do you think your core task is? And does mobilization fit in your core task?
3. What is needed for mobilization and training to be perceived as and becoming an integral part of treatment for all groups?
4. What are the possibilities for supporting physical activity in patients during hospitalization? In answering this question, we would ask you to consider the following points:
  - The possibilities for interdisciplinary cooperation
  - The possibilities for cross-sectoral cooperation
5. During the observation study, you mentioned that physical space is central to mobilization. Despite this, we did not see that they were used extensively.

What is needed for the physical space to be used - whether large, small or the hallway?

6. What concrete ideas might work in your department? Please include the following in your discussion:
  - Standardization of mobilization, e.g. as in fast track of surgical patients
  - The use of e.g. "lung paths" or coffee gymnastics
  - The use of verbal communication from both nurses, doctors and therapists - performing motivational conversation
  - The use of self-training

**QUESTIONS FOR WORKSHOP I – STAFF IN THE MUNICIPALITY AND IN THE MUNICIPALITY-BASED REHABILITATION CENTER**

7. Are there any differences between professions in relation to mobilization of patients in the municipality? How do these differences appear? And what is the consequence of these differences? (about 10 minutes).
8. Which interdisciplinary cooperation exists in the municipality regarding mobilization and training of citizens? (about 10 minutes).
9. How do you work to support citizens who have been hospitalized to return to previous activity levels (both in the municipality and in the municipality-based rehabilitation center) (about 10 minutes)?
10. What are the possibilities of supporting physical activity in patients during hospitalization? In answering this question, we would ask you to consider the following points:
  - The possibilities for interdisciplinary cooperation
  - The possibilities for cross-sectoral cooperation
11. In addition to the above questions, we would like you to discuss concrete ideas for how a municipal effort could be implemented? Please include the following in your discussion:
  - The use of welfare technology solutions - like motivational SMS messages and "screen training"
  - The use of verbal communication from both nurses, doctors, and therapists - performing motivational conversation
  - The use of self-training
