# Supplementary material for: A tailored strategy for designing the Walk-Copenhagen (WALK-Cph) intervention to increase mobility in hospitalised older medical patients: a protocol for the qualitative part of the WALK-Cph project
Source: PubMed Central journal article supplement — BMJ Open. 2018 Mar 8;8(3):e020272. doi: 10.1136/bmjopen-2017-020272 (PMC5855176; doi:10.1136/bmjopen-2017-020272), 2018-03-08
Supplement: bmjopen-2017-020272supp001.pdf [file bmjopen-2017-020272supp001.pdf]

## Appendix 1: OBSERVATION GUIDE I TO WALK-Cph.

## Appendix 2: OBSERVATION GUIDE II TO WALK-Cph (researcher reflection).
